# Supplementary material
Source: publisher figshare collection journal article supplement (https://acs.figshare.com/ndownloader/files/20421276)
Supplement: Supplementary file 1 [file 20421276]

## SUPPORTING INFORMATION

# Isopimarane Diterpenoids from the Rhizomes of *Kaempferia marginata* and Their Potential Anti-inflammatory Activities

Ratchanaporn Chokchaisiri,<sup>\*,†</sup> Waraluck Chaichompoo,<sup>‡</sup> Warangkana Chunglok,<sup>§</sup> Sarot Cheenpracha,<sup>†</sup> Lucksagoon Ganranoo,<sup>†</sup> Nathaporn Phutthawong,<sup>†</sup> Sareeya Bureekaew,<sup>⊥</sup> and Apichart Suksamrarn<sup>‡</sup>

<sup>†</sup>Department of Chemistry, School of Science, University of Phayao, Muang, Phayao 56000, Thailand

<sup>‡</sup>Department of Chemistry and Center of Excellence for Innovation in Chemistry, Faculty of Science, Ramkhamhaeng University, Bangkok 10240, Thailand

<sup>§</sup>School of Allied Health Sciences and Research Institute for Health Sciences, Walailak University, Nakhon Si Thammarat 80161, Thailand

<sup>⊥</sup>Department of Energy Science and Engineering, Vidyasirimedhi Institute of Science and Technology (VISTEC), Wangchan, Rayong 21210, Thailand

| Contents                                                                                                                                                                                                                                                                                                                           | Page |
|------------------------------------------------------------------------------------------------------------------------------------------------------------------------------------------------------------------------------------------------------------------------------------------------------------------------------------|------|
| <b>Figure S1.</b> The structure of known compounds <b>7–14</b> .                                                                                                                                                                                                                                                                   | 4    |
| <b>Figure S2.</b> The COSY and key HMBC ( $^1\text{H} \rightarrow ^{13}\text{C}$ ) correlations of compounds <b>1–6</b> .                                                                                                                                                                                                          | 4    |
| <b>Figure S3.</b> $^1\text{H}$ NMR spectrum ( $\text{CDCl}_3$ , 400 MHz) of marginaol A ( <b>1</b> )                                                                                                                                                                                                                               | 5    |
| <b>Figure S4.</b> $^{13}\text{C}$ NMR spectrum ( $\text{CDCl}_3$ , 100 MHz) of marginaol A ( <b>1</b> )                                                                                                                                                                                                                            | 5    |
| <b>Figure S5.</b> COSY spectrum of marginaol A ( <b>1</b> ) in $\text{CDCl}_3$                                                                                                                                                                                                                                                     | 6    |
| <b>Figure S6.</b> HMQC spectrum of marginaol A ( <b>1</b> ) in $\text{CDCl}_3$                                                                                                                                                                                                                                                     | 6    |
| <b>Figure S7.</b> HMBC spectrum of marginaol A ( <b>1</b> ) in $\text{CDCl}_3$                                                                                                                                                                                                                                                     | 7    |
| <b>Figure S8.</b> Difference NOE of <b>1</b> irradiating H-1 in $\text{CDCl}_3$                                                                                                                                                                                                                                                    | 7    |
| <b>Figure S9.</b> Difference NOE of <b>1</b> irradiating H-2 in $\text{CDCl}_3$                                                                                                                                                                                                                                                    | 8    |
| <b>Figure S10.</b> Difference NOE of <b>1</b> irradiating H-6 in $\text{CDCl}_3$                                                                                                                                                                                                                                                   | 8    |
| <b>Figure S11.</b> Difference NOE of <b>1</b> irradiating H-7 $\alpha$ in $\text{CDCl}_3$                                                                                                                                                                                                                                          | 9    |
| <b>Figure S12.</b> Difference NOE of <b>1</b> irradiating H-7 $\beta$ in $\text{CDCl}_3$                                                                                                                                                                                                                                           | 9    |
| <b>Figure S13.</b> Difference NOE of <b>1</b> irradiating H-9 in $\text{CDCl}_3$                                                                                                                                                                                                                                                   | 10   |
| <b>Figure S14.</b> Calculated ECD spectra of (1 <i>R</i> , 2 <i>S</i> , 5 <i>S</i> , 6 <i>R</i> , 9 <i>S</i> , 10 <i>R</i> , 13 <i>R</i> )- <b>1a</b> and (1 <i>S</i> , 2 <i>R</i> , 5 <i>R</i> , 6 <i>S</i> , 9 <i>R</i> , 10 <i>S</i> , 13 <i>S</i> )- <b>1b</b> isomers and the experimental ECD spectrum of <b>1</b> in MeOH   | 10   |
| <b>Figure S15.</b> $^1\text{H}$ NMR spectrum ( $\text{CDCl}_3$ , 400 MHz) of marginaol B ( <b>2</b> )                                                                                                                                                                                                                              | 11   |
| <b>Figure S16.</b> $^{13}\text{C}$ NMR spectrum ( $\text{CDCl}_3$ , 100 MHz) of marginaol B ( <b>2</b> )                                                                                                                                                                                                                           | 11   |
| <b>Figure S17.</b> COSY spectrum of marginaol B ( <b>2</b> ) in $\text{CDCl}_3$                                                                                                                                                                                                                                                    | 12   |
| <b>Figure S18.</b> HMQC spectrum of marginaol B ( <b>2</b> ) in $\text{CDCl}_3$                                                                                                                                                                                                                                                    | 12   |
| <b>Figure S19.</b> HMBC spectrum of marginaol B ( <b>2</b> ) in $\text{CDCl}_3$                                                                                                                                                                                                                                                    | 13   |
| <b>Figure S20.</b> Difference NOE of <b>2</b> irradiating H-1 in $\text{CDCl}_3$                                                                                                                                                                                                                                                   | 13   |
| <b>Figure S21.</b> Difference NOE of <b>2</b> irradiating H-3 in $\text{CDCl}_3$                                                                                                                                                                                                                                                   | 14   |
| <b>Figure S22.</b> Difference NOE of <b>2</b> irradiating H-5 in $\text{CDCl}_3$                                                                                                                                                                                                                                                   | 14   |
| <b>Figure S23.</b> Difference NOE of <b>2</b> irradiating H-11 in $\text{CDCl}_3$                                                                                                                                                                                                                                                  | 15   |
| <b>Figure S24.</b> Calculated ECD spectra of (1 <i>S</i> , 3 <i>R</i> , 5 <i>S</i> , 9 <i>S</i> , 10 <i>S</i> , 11 <i>R</i> , 13 <i>R</i> )- <b>2a</b> and (1 <i>R</i> , 3 <i>S</i> , 5 <i>R</i> , 9 <i>R</i> , 10 <i>R</i> , 11 <i>S</i> , 13 <i>S</i> )- <b>2b</b> isomers and the experimental ECD spectrum of <b>2</b> in MeOH | 15   |
| <b>Figure S25.</b> $^1\text{H}$ NMR spectrum ( $\text{CDCl}_3$ , 400 MHz) of marginaol C ( <b>3</b> )                                                                                                                                                                                                                              | 16   |
| <b>Figure S26.</b> $^{13}\text{C}$ NMR spectrum ( $\text{CDCl}_3$ , 100 MHz) of marginaol C ( <b>3</b> )                                                                                                                                                                                                                           | 16   |
| <b>Figure S27.</b> COSY spectrum of marginaol C ( <b>3</b> ) in $\text{CDCl}_3$                                                                                                                                                                                                                                                    | 17   |
| <b>Figure S28.</b> HMQC spectrum of marginaol C ( <b>3</b> ) in $\text{CDCl}_3$                                                                                                                                                                                                                                                    | 17   |
| <b>Figure S29.</b> HMBC spectrum marginaol C ( <b>3</b> ) in $\text{CDCl}_3$                                                                                                                                                                                                                                                       | 18   |
| <b>Figure S30.</b> Difference NOE of <b>3</b> irradiating H-3 in $\text{CDCl}_3$                                                                                                                                                                                                                                                   | 18   |
| <b>Figure S31.</b> Difference NOE of <b>3</b> irradiating H-5 in $\text{CDCl}_3$                                                                                                                                                                                                                                                   | 19   |
| <b>Figure S32.</b> Difference NOE of <b>3</b> irradiating H-7 $\beta$ in $\text{CDCl}_3$                                                                                                                                                                                                                                           | 19   |

---

|                                                                                                                                                                                                                                                                                                                                    |    |
|------------------------------------------------------------------------------------------------------------------------------------------------------------------------------------------------------------------------------------------------------------------------------------------------------------------------------------|----|
| <b>Figure S33.</b> Difference NOE of <b>3</b> irradiating H-11 in CDCl <sub>3</sub>                                                                                                                                                                                                                                                | 20 |
| <b>Figure S34.</b> Difference NOE of <b>3</b> irradiating H <sub>3</sub> -20 in CDCl <sub>3</sub>                                                                                                                                                                                                                                  | 20 |
| <b>Figure S35.</b> Calculated ECD spectra of (3 <i>S</i> , 5 <i>S</i> , 6 <i>R</i> , 9 <i>S</i> , 10 <i>R</i> , 11 <i>S</i> , 13 <i>R</i> )- <b>3a</b> and (3 <i>R</i> , 5 <i>R</i> , 6 <i>S</i> , 9 <i>R</i> , 10 <i>S</i> , 11 <i>R</i> , 13 <i>S</i> )- <b>3b</b> isomers and the experimental ECD spectrum of <b>3</b> in MeOH | 21 |
| <b>Figure S36.</b> <sup>1</sup> H NMR spectrum (CDCl <sub>3</sub> , 400 MHz) of marginaol D ( <b>4</b> )                                                                                                                                                                                                                           | 21 |
| <b>Figure S37.</b> <sup>13</sup> C NMR spectrum (CDCl <sub>3</sub> , 100 MHz) of marginaol D ( <b>4</b> )                                                                                                                                                                                                                          | 22 |
| <b>Figure S38.</b> COSY spectrum of marginaol D ( <b>4</b> ) in CDCl <sub>3</sub>                                                                                                                                                                                                                                                  | 22 |
| <b>Figure S39.</b> HMQC spectrum of marginaol D ( <b>4</b> ) in CDCl <sub>3</sub>                                                                                                                                                                                                                                                  | 23 |
| <b>Figure S40.</b> HMBC spectrum of marginaol D ( <b>4</b> ) in CDCl <sub>3</sub>                                                                                                                                                                                                                                                  | 23 |
| <b>Figure S41.</b> Difference NOE of <b>4</b> irradiating H-3 in CDCl <sub>3</sub>                                                                                                                                                                                                                                                 | 24 |
| <b>Figure S42.</b> Difference NOE of <b>4</b> irradiating H-9 in CDCl <sub>3</sub>                                                                                                                                                                                                                                                 | 24 |
| <b>Figure S43.</b> Difference NOE of <b>4</b> irradiating H-11 in CDCl <sub>3</sub>                                                                                                                                                                                                                                                | 25 |
| <b>Figure S44.</b> Calculated ECD spectra of (1 <i>S</i> , 3 <i>S</i> , 5 <i>S</i> , 9 <i>S</i> , 10 <i>S</i> , 11 <i>R</i> , 13 <i>R</i> )- <b>4a</b> and (1 <i>R</i> , 3 <i>R</i> , 5 <i>R</i> , 9 <i>R</i> , 10 <i>R</i> , 11 <i>S</i> , 13 <i>S</i> )- <b>4b</b> isomers and the experimental ECD spectrum of <b>4</b> in MeOH | 25 |
| <b>Figure S45.</b> <sup>1</sup> H NMR spectrum (CD <sub>3</sub> OD, 400 MHz) of marginaol E ( <b>5</b> )                                                                                                                                                                                                                           | 26 |
| <b>Figure S46.</b> <sup>13</sup> C NMR spectrum (CD <sub>3</sub> OD, 100 MHz) of marginaol E ( <b>5</b> )                                                                                                                                                                                                                          | 26 |
| <b>Figure S47.</b> COSY spectrum of marginaol E ( <b>5</b> ) in CD <sub>3</sub> OD                                                                                                                                                                                                                                                 | 27 |
| <b>Figure S48.</b> HMQC spectrum of marginaol E ( <b>5</b> ) in CD <sub>3</sub> OD                                                                                                                                                                                                                                                 | 27 |
| <b>Figure S49.</b> HMBC spectrum of marginaol E ( <b>5</b> ) in CD <sub>3</sub> OD                                                                                                                                                                                                                                                 | 28 |
| <b>Figure S50.</b> Difference NOE of <b>5</b> irradiating H-1 in CD <sub>3</sub> OD                                                                                                                                                                                                                                                | 28 |
| <b>Figure S51.</b> Difference NOE of <b>5</b> irradiating H-3 in CD <sub>3</sub> OD                                                                                                                                                                                                                                                | 29 |
| <b>Figure S52.</b> Difference NOE of <b>5</b> irradiating H-5 in CD <sub>3</sub> OD                                                                                                                                                                                                                                                | 29 |
| <b>Figure S53.</b> Difference NOE of <b>5</b> irradiating H-7 in CD <sub>3</sub> OD                                                                                                                                                                                                                                                | 30 |
| <b>Figure S54.</b> Difference NOE of <b>5</b> irradiating H-11 in CD <sub>3</sub> OD                                                                                                                                                                                                                                               | 30 |
| <b>Figure S55.</b> <sup>1</sup> H NMR spectrum (CD <sub>3</sub> OD, 400 MHz) of marginaol F ( <b>6</b> )                                                                                                                                                                                                                           | 31 |
| <b>Figure S56.</b> <sup>13</sup> C NMR spectrum (CD <sub>3</sub> OD, 100 MHz) of marginaol E ( <b>6</b> )                                                                                                                                                                                                                          | 31 |
| <b>Figure S57.</b> COSY spectrum of marginaol E ( <b>6</b> ) in CD <sub>3</sub> OD                                                                                                                                                                                                                                                 | 32 |
| <b>Figure S58.</b> HMQC spectrum of marginaol E ( <b>6</b> ) in CD <sub>3</sub> OD                                                                                                                                                                                                                                                 | 32 |
| <b>Figure S59.</b> HMBC spectrum of marginaol E ( <b>6</b> ) in CD <sub>3</sub> OD                                                                                                                                                                                                                                                 | 33 |
| <b>Figure S60.</b> Difference NOE of <b>6</b> irradiating H-3 in CD <sub>3</sub> OD                                                                                                                                                                                                                                                | 33 |
| <b>Figure S61.</b> Difference NOE of <b>6</b> irradiating H-5 in CD <sub>3</sub> OD                                                                                                                                                                                                                                                | 34 |
| <b>Figure S62.</b> Difference NOE of <b>6</b> irradiating H-11 in CD <sub>3</sub> OD                                                                                                                                                                                                                                               | 34 |

---

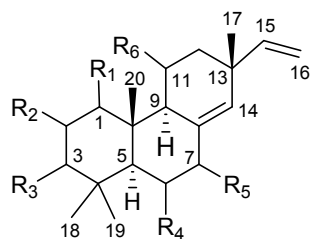

- 7**,  $R_1 = \alpha\text{-OH}$ ,  $R_2 = R_3 = R_4 = R_5 = R_6 = \text{H}$   
**8**,  $R_1 = \alpha\text{-OH}$ ,  $R_2 = R_3 = R_4 = R_6 = \text{H}$ ,  $R_5 = \text{=O}$   
**9**,  $R_1 = R_6 = \alpha\text{-OH}$ ,  $R_2 = R_3 = R_4 = R_5 = \text{H}$   
**10**,  $R_1 = \alpha\text{-OAc}$ ,  $R_2 = \alpha\text{-OH}$ ,  $R_3 = R_4 = R_5 = R_6 = \text{H}$   
**11**,  $R_1 = R_2 = \alpha\text{-OH}$ ,  $R_3 = R_4 = R_5 = R_6 = \text{H}$   
**12**,  $R_1 = R_3 = R_4 = R_6 = \text{H}$ ,  $R_2 = \alpha\text{-OH}$ ,  $R_5 = \text{=O}$   
**13**,  $R_1 = R_2 = \alpha\text{-OH}$ ,  $R_3 = R_4 = R_6 = \text{H}$ ,  $R_5 = \beta\text{-OH}$   
**14**,  $R_1 = R_5 = R_6 = \alpha\text{-OH}$ ,  $R_2 = R_3 = R_4 = \text{H}$

**Figure S1.** The structure of known compounds **7–14**.

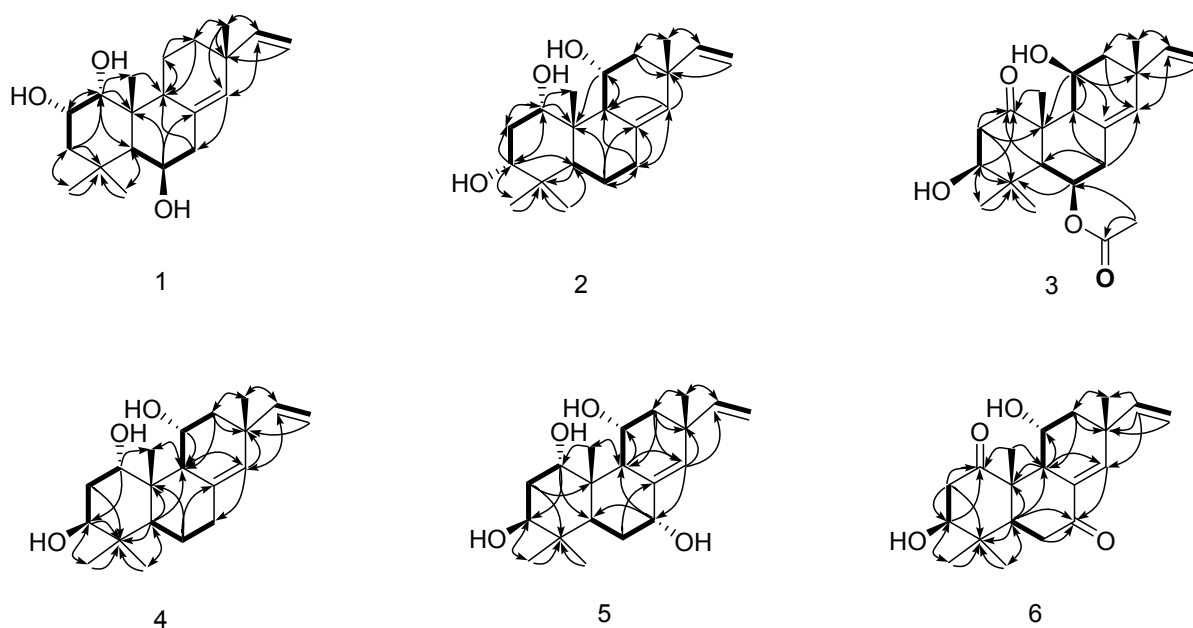

**Figure S2.** The COSY and key HMBC ( $^1\text{H} \rightarrow ^{13}\text{C}$ ) correlations of compounds **1–6**.

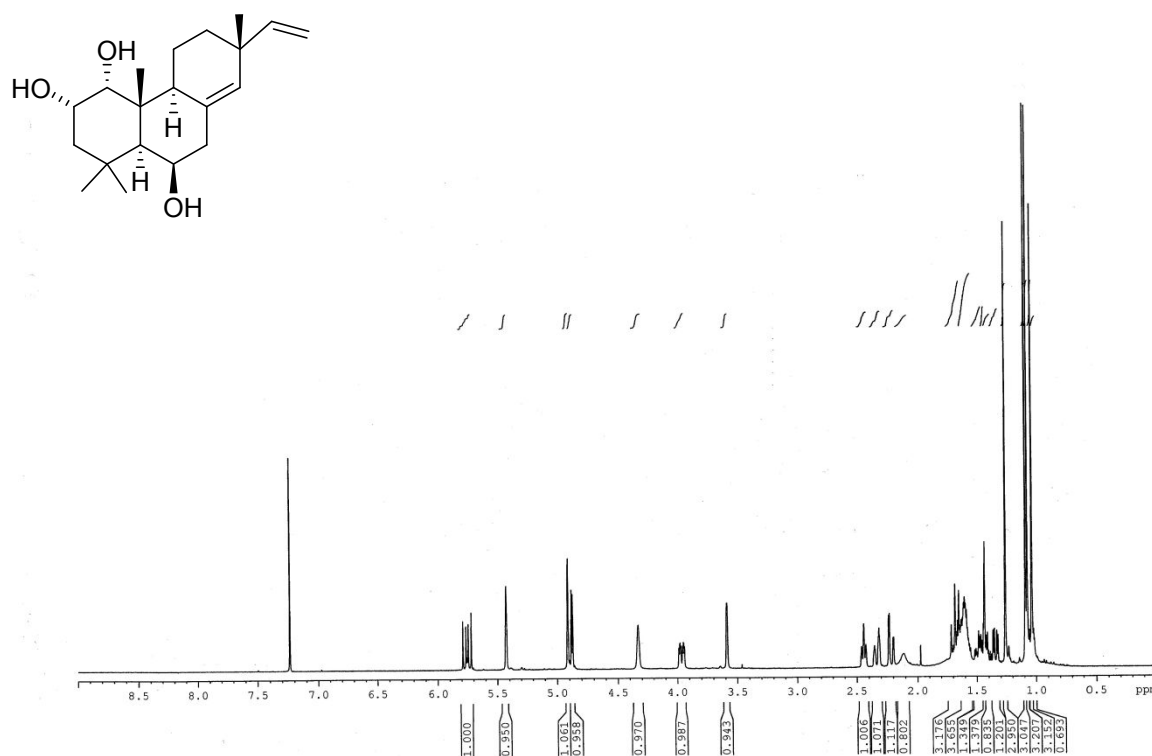

Figure S3. <sup>1</sup>H NMR spectrum (CDCl<sub>3</sub>, 400 MHz) of marginaol A (1)

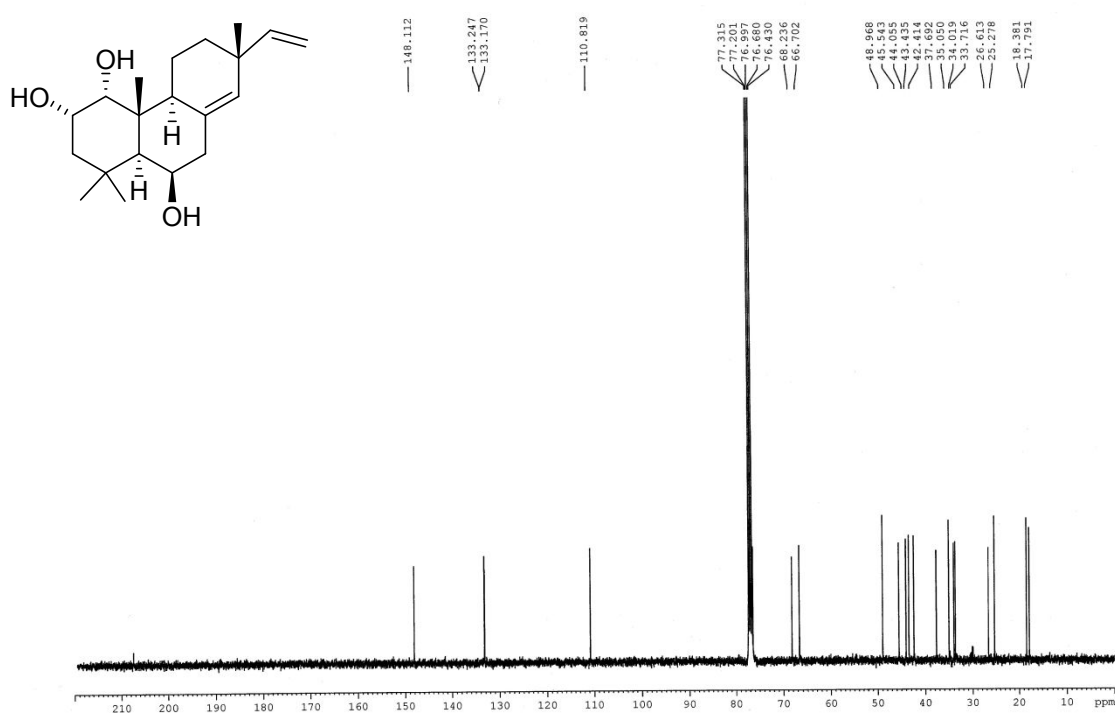

Figure S4. <sup>13</sup>C NMR spectrum (CDCl<sub>3</sub>, 100 MHz) of marginaol A (1)

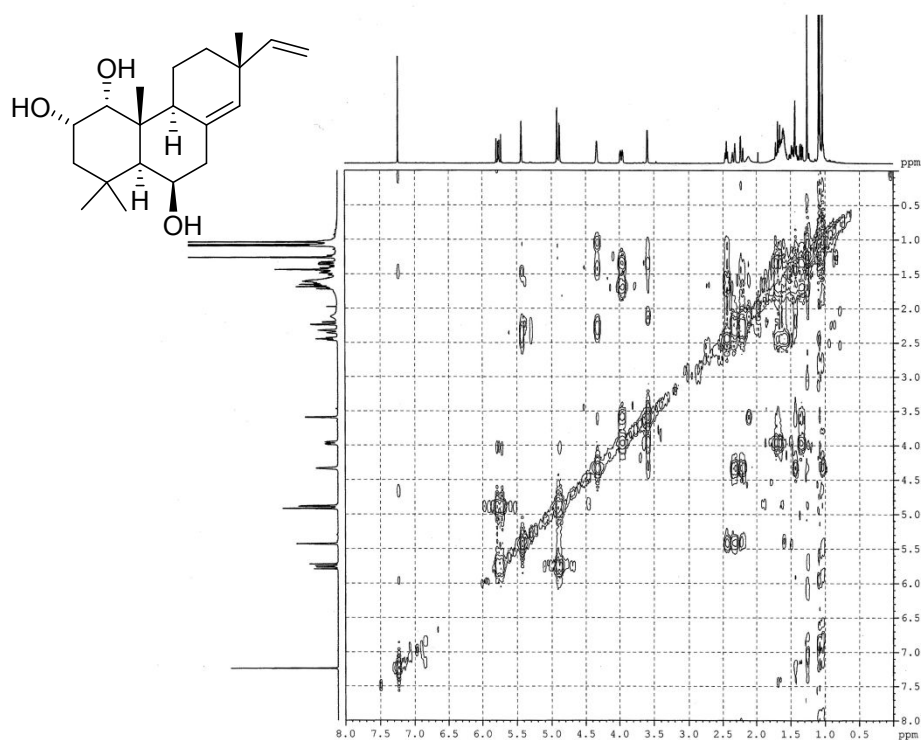

**Figure S5.** COSY spectrum of marginaol A (**1**) in CDCl<sub>3</sub>

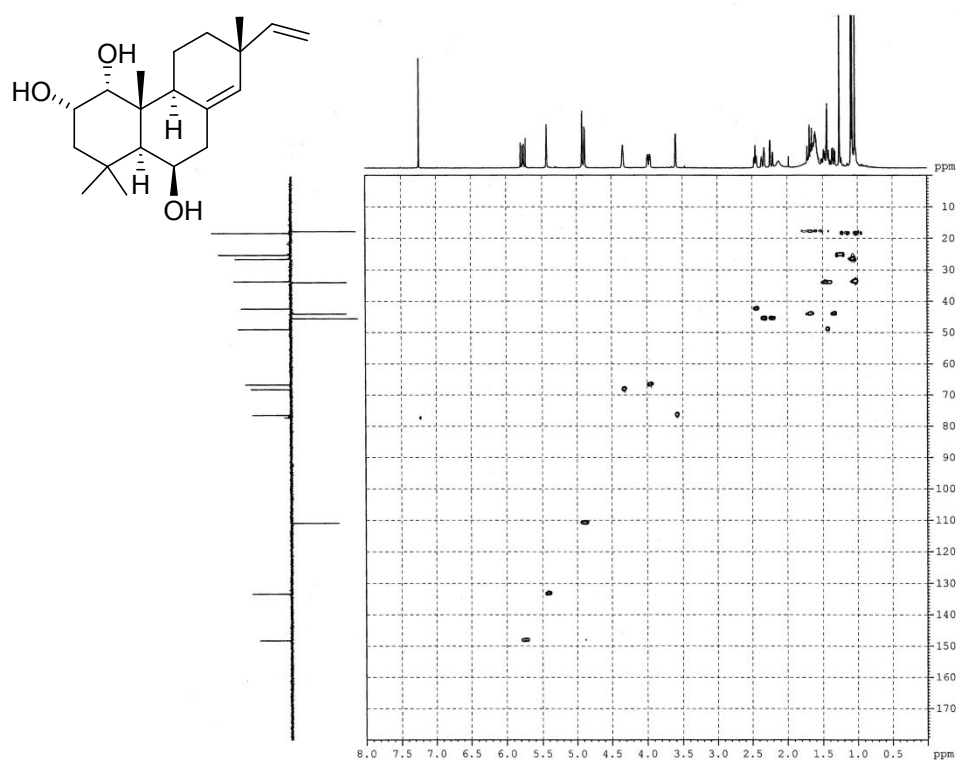

**Figure S6.** HMQC spectrum of marginaol A (**1**) in CDCl<sub>3</sub>

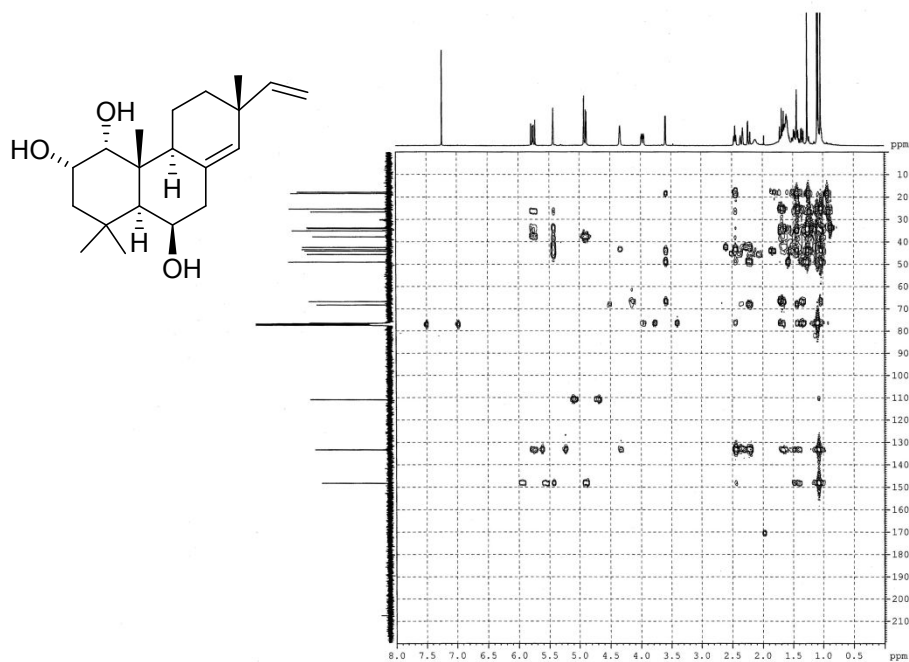

**Figure S7.** HMBC spectrum of marginaol A (**1**) in  $\text{CDCl}_3$

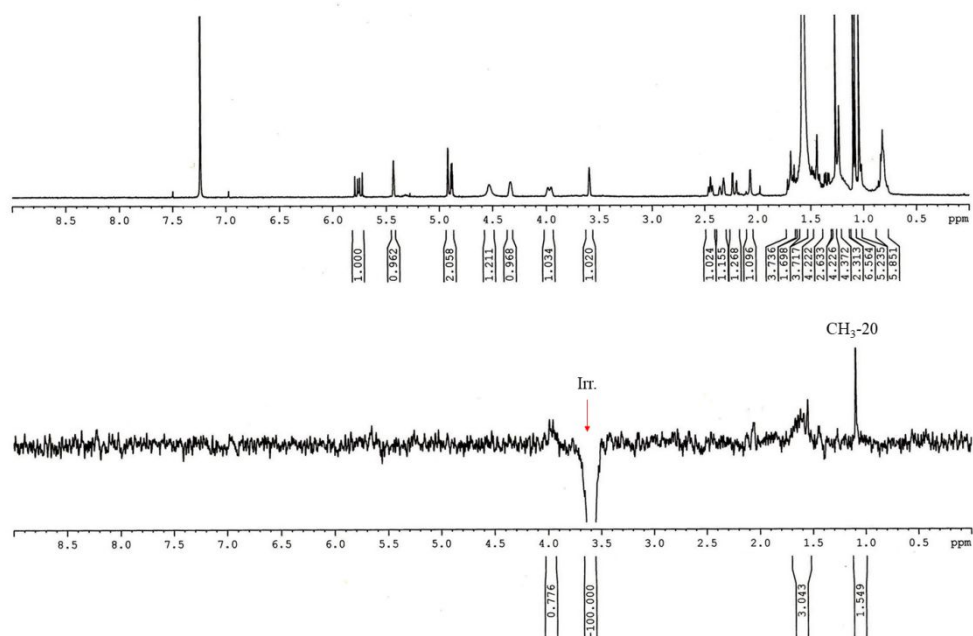

**Figure S8.** Difference NOE of **1** irradiating H-1 in  $\text{CDCl}_3$

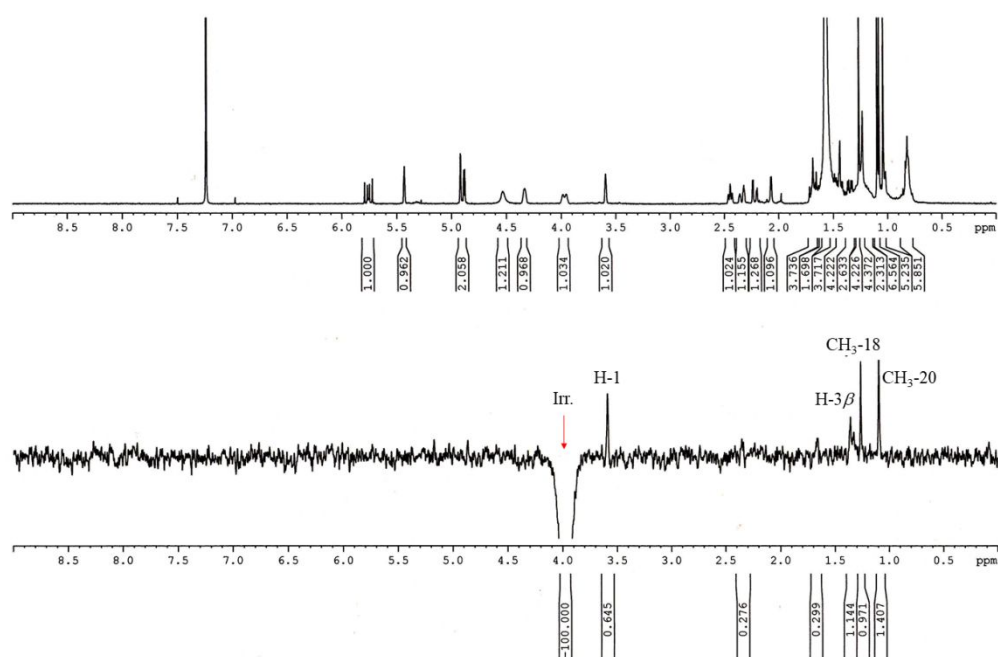

**Figure S9.** Difference NOE of **1** irradiating H-2 in  $\text{CDCl}_3$

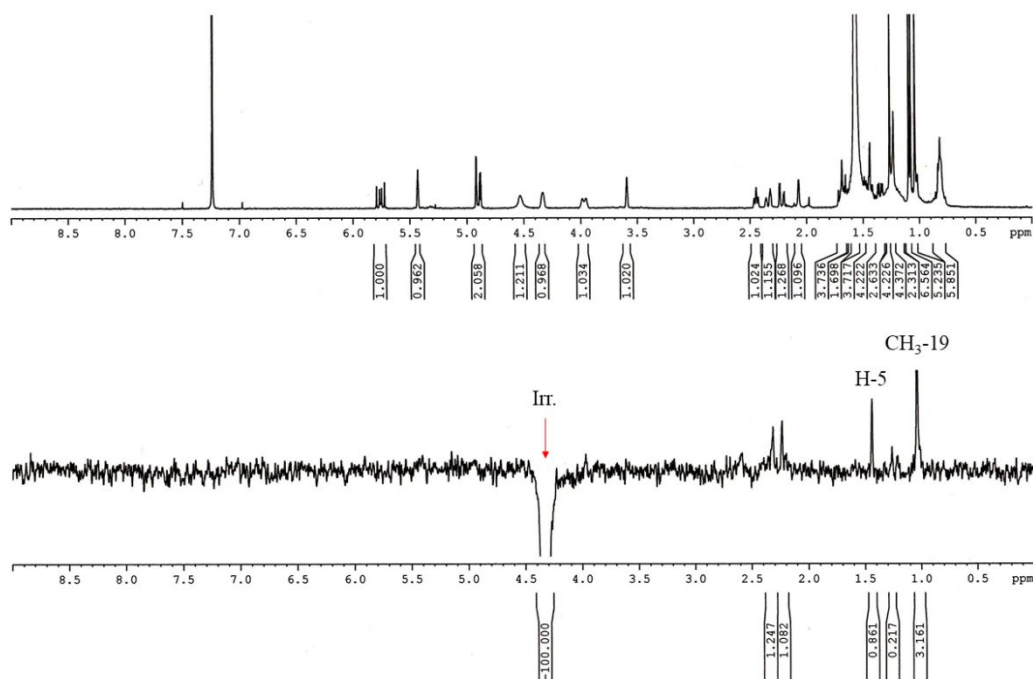

**Figure S10.** Difference NOE of **1** irradiating H-6 in  $\text{CDCl}_3$

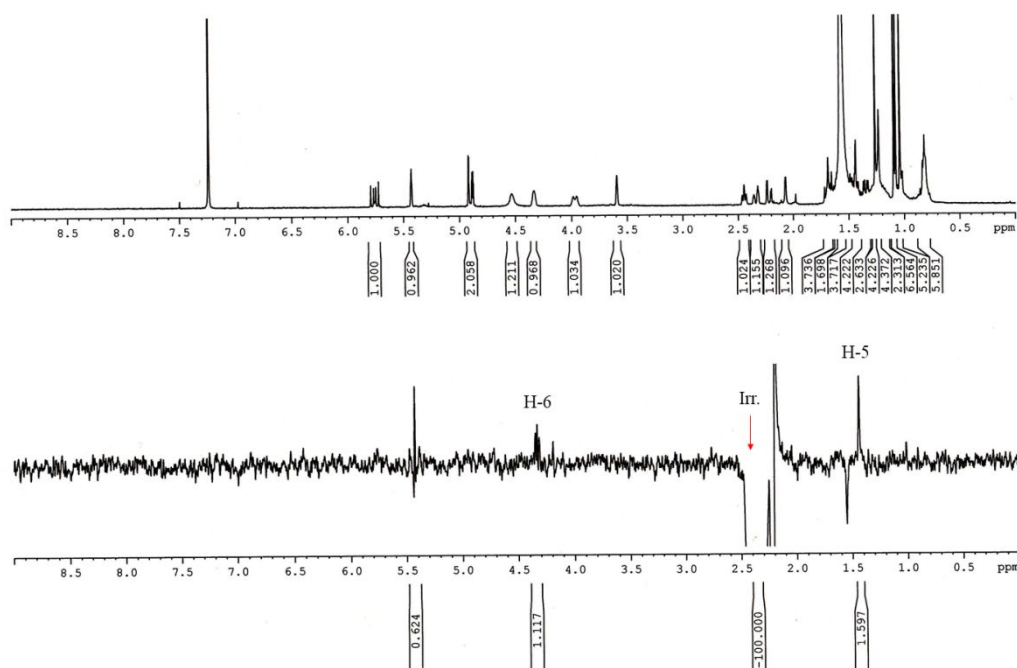

**Figure S11.** Difference NOE of **1** irradiating H-7 $\alpha$  in  $\text{CDCl}_3$

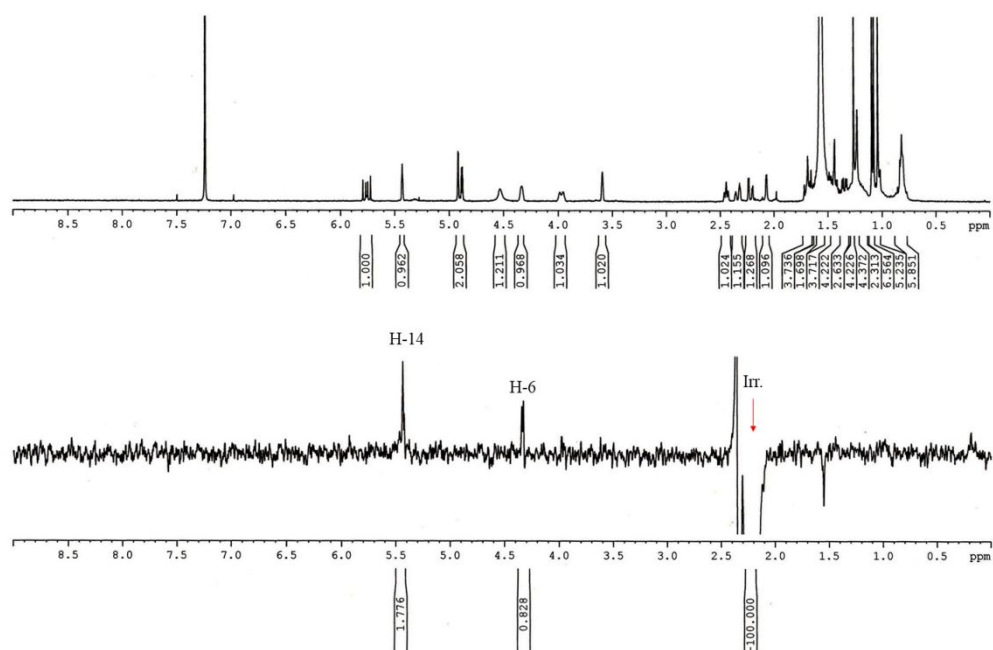

**Figure S12.** Difference NOE of **1** irradiating H-7 $\beta$  in  $\text{CDCl}_3$

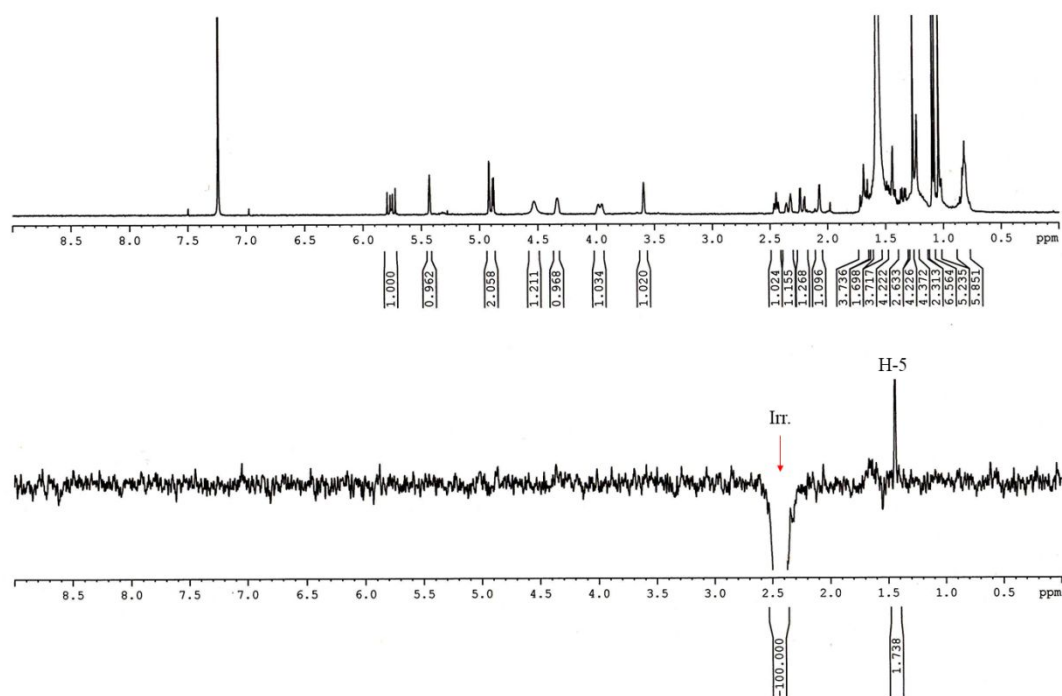

**Figure S13.** Difference NOE of **1** irradiating H-9 in  $\text{CDCl}_3$

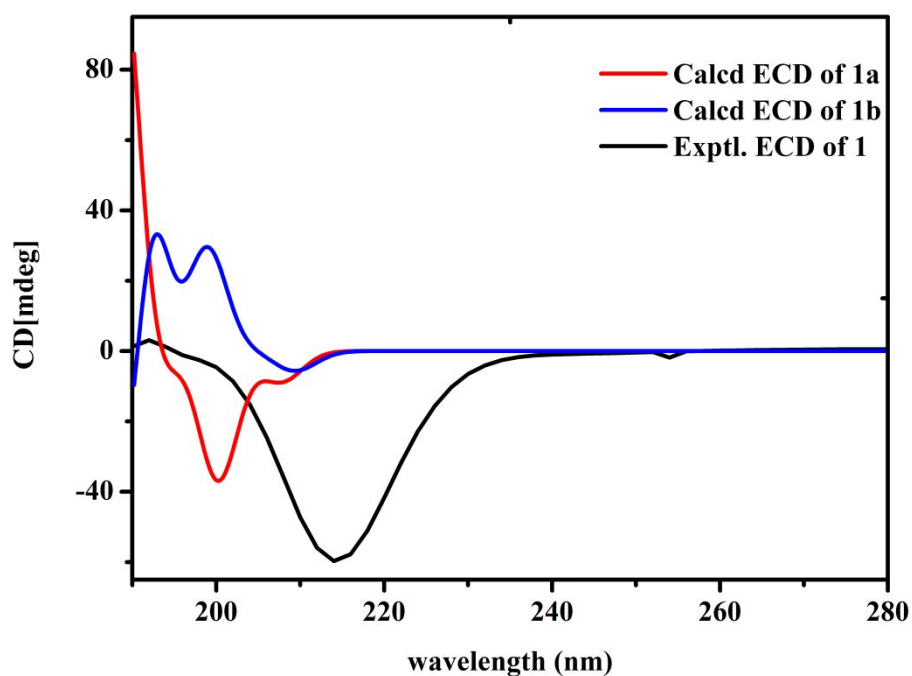

**Figure S14.** Calculated ECD spectra of (1*R*, 2*S*, 5*S*, 6*R*, 9*S*, 10*R*, 13*R*)-**1a** and (1*S*, 2*R*, 5*R*, 6*S*, 9*R*, 10*S*, 13*S*)-**1b** isomers and the experimental ECD spectrum of **1** in MeOH

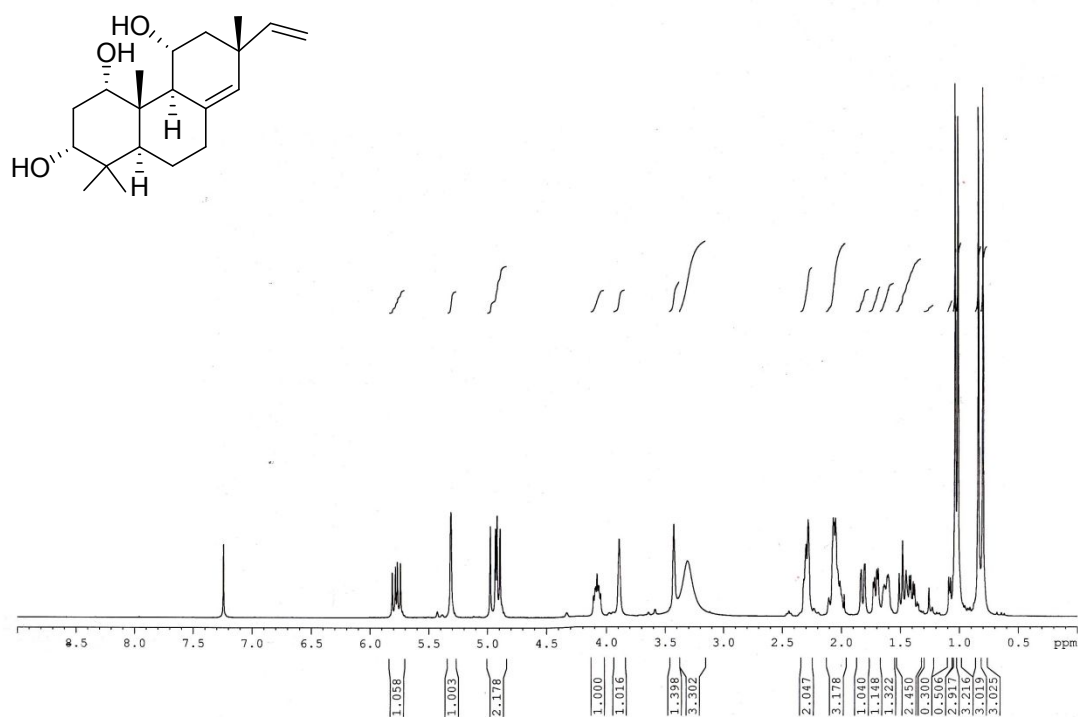

**Figure S15.** <sup>1</sup>H NMR spectrum (CDCl<sub>3</sub>, 400 MHz) of marginaol B (2)

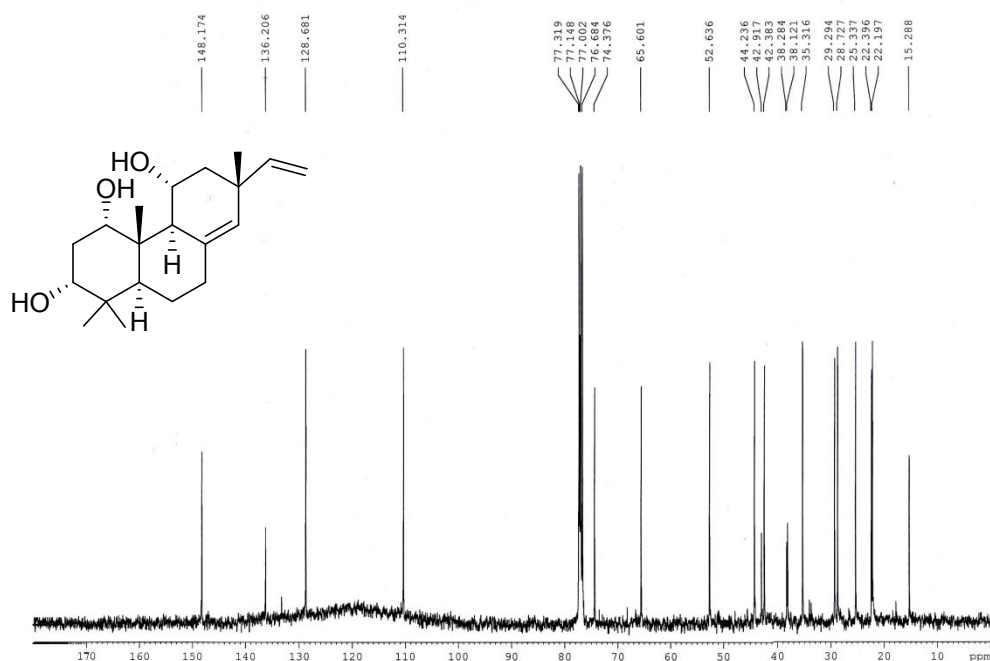

**Figure S16.** <sup>13</sup>C NMR spectrum (CDCl<sub>3</sub>, 100 MHz) of marginaol B (2)

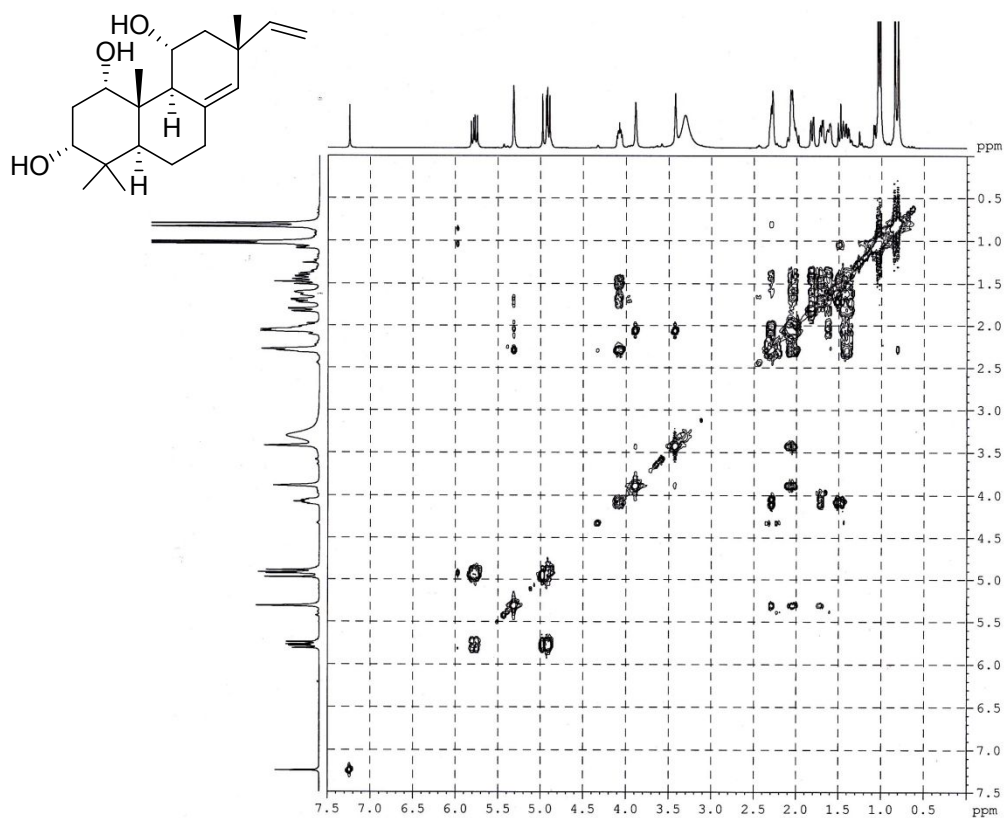

**Figure S17.** COSY spectrum of marginaol B (2) in CDCl<sub>3</sub>

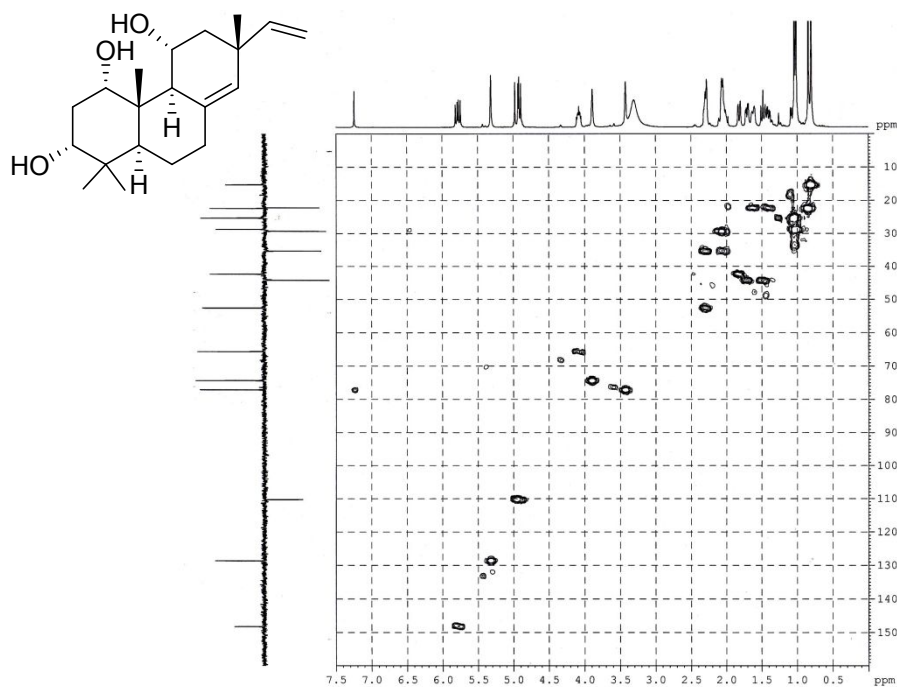

**Figure S18.** HMQC spectrum of marginaol B (2) in CDCl<sub>3</sub>

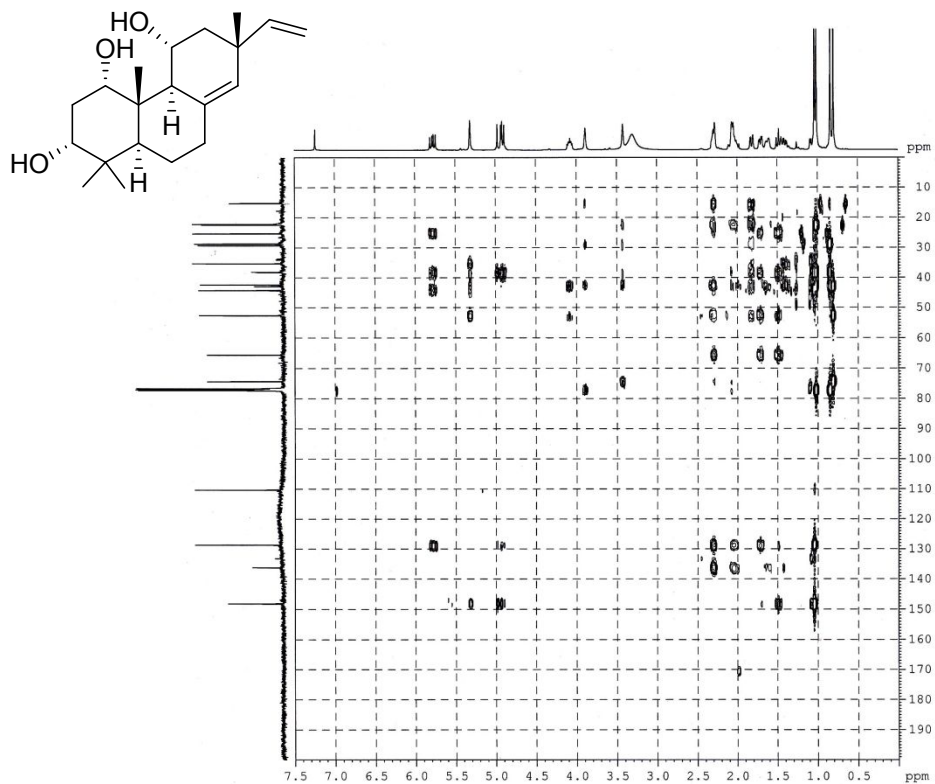

**Figure S19.** HMBC spectrum of marginaol B (**2**) in  $\text{CDCl}_3$

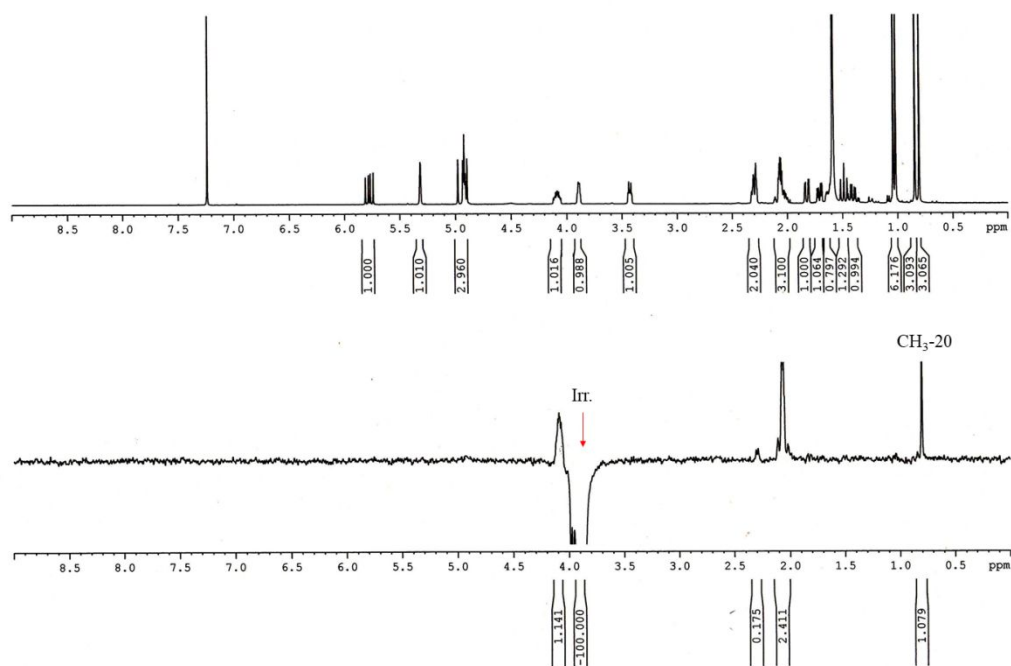

**Figure S20.** Difference NOE of **2** irradiating H-1 in  $\text{CDCl}_3$

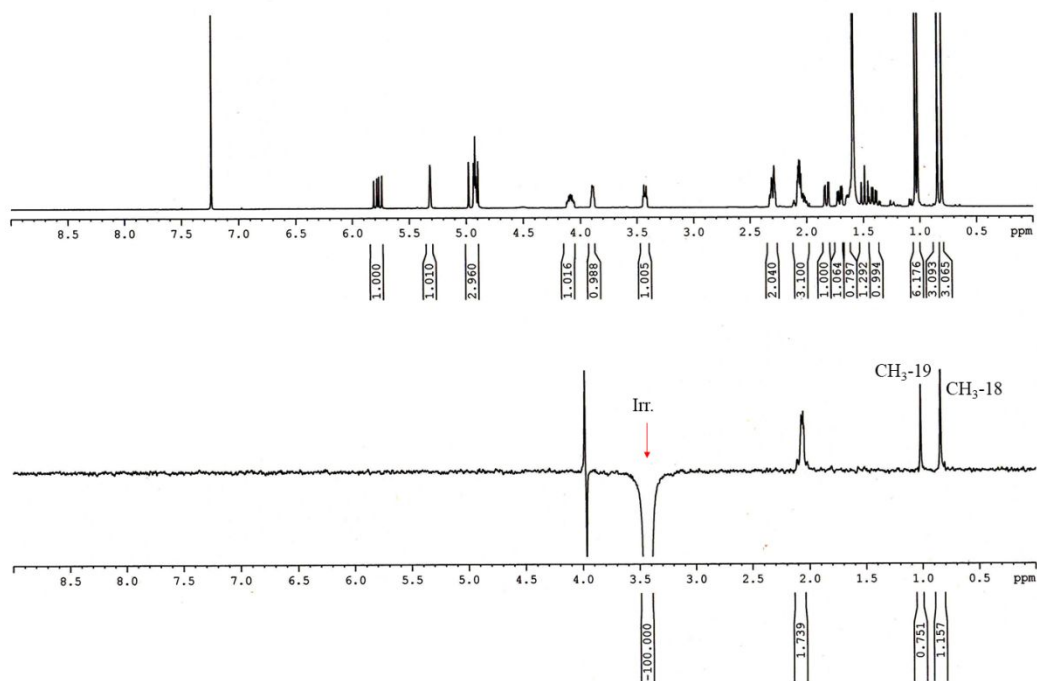

**Figure S21.** Difference NOE of **2** irradiating H-3 in  $\text{CDCl}_3$

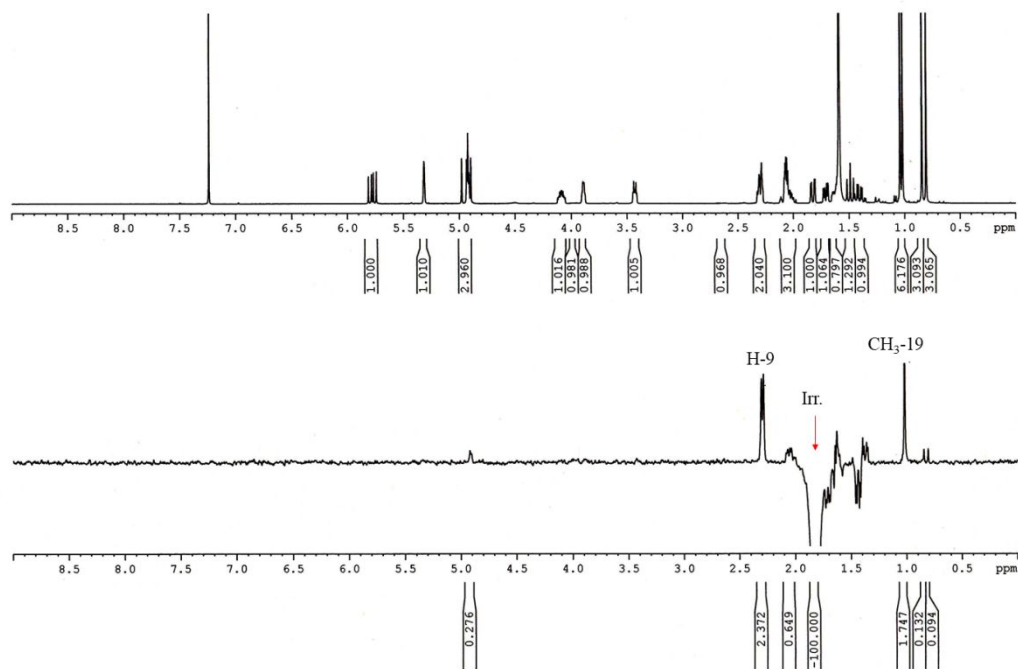

**Figure S22.** Difference NOE of **2** irradiating H-5 in  $\text{CDCl}_3$

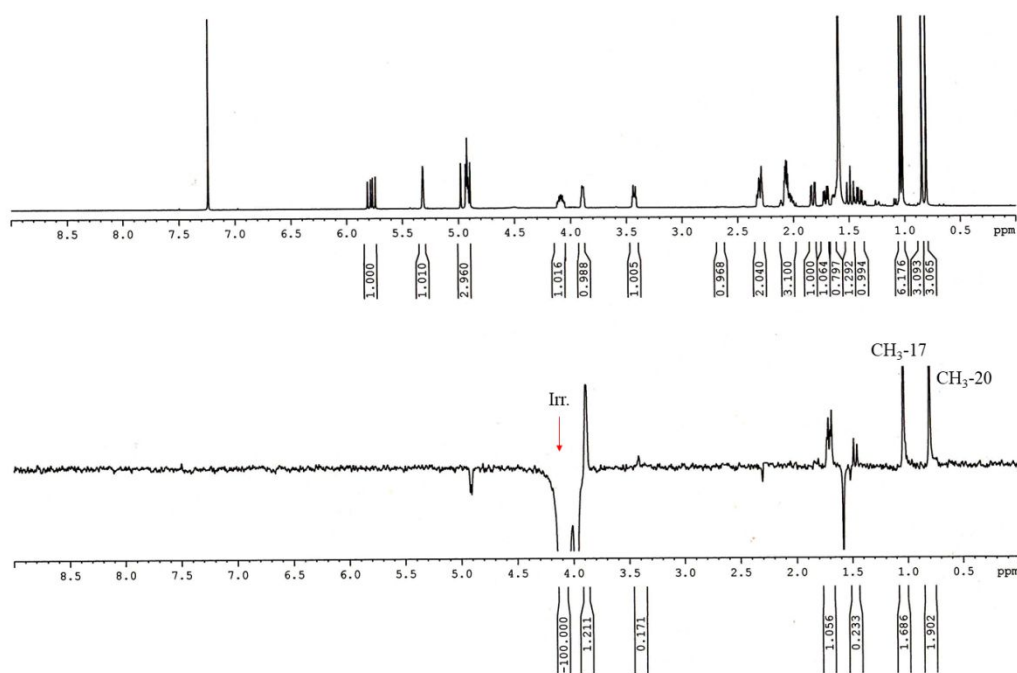

**Figure S23.** Difference NOE of **2** irradiating H-11 in  $\text{CDCl}_3$

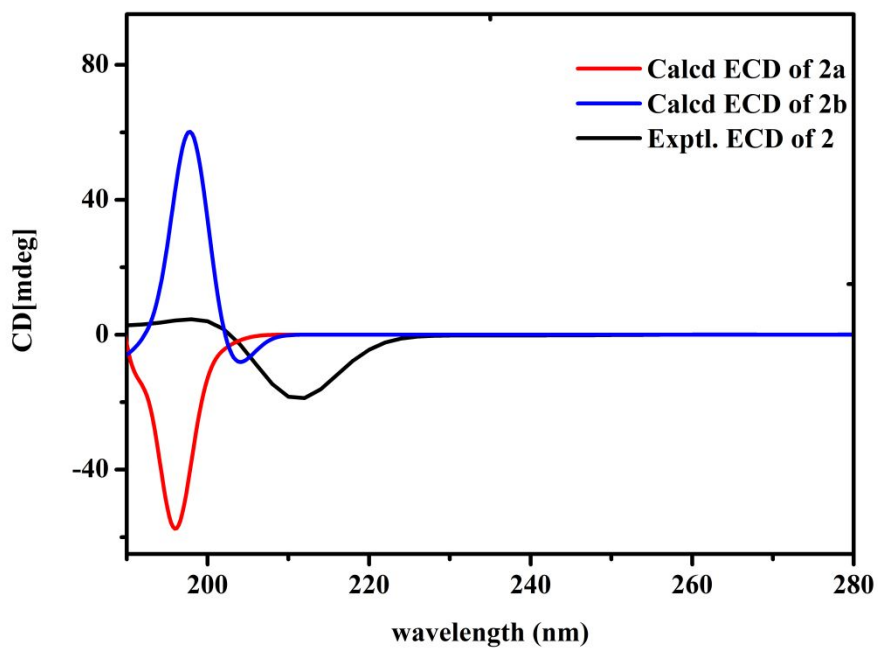

**Figure S24.** Calculated ECD spectra of (1*S*, 3*R*, 5*S*, 9*S*, 10*S*, 11*R*, 13*R*)-**2a** and (1*R*, 3*S*, 5*R*, 9*R*, 10*R*, 11*S*, 13*S*)-**2b** isomers and the experimental ECD spectrum of **2** in MeOH

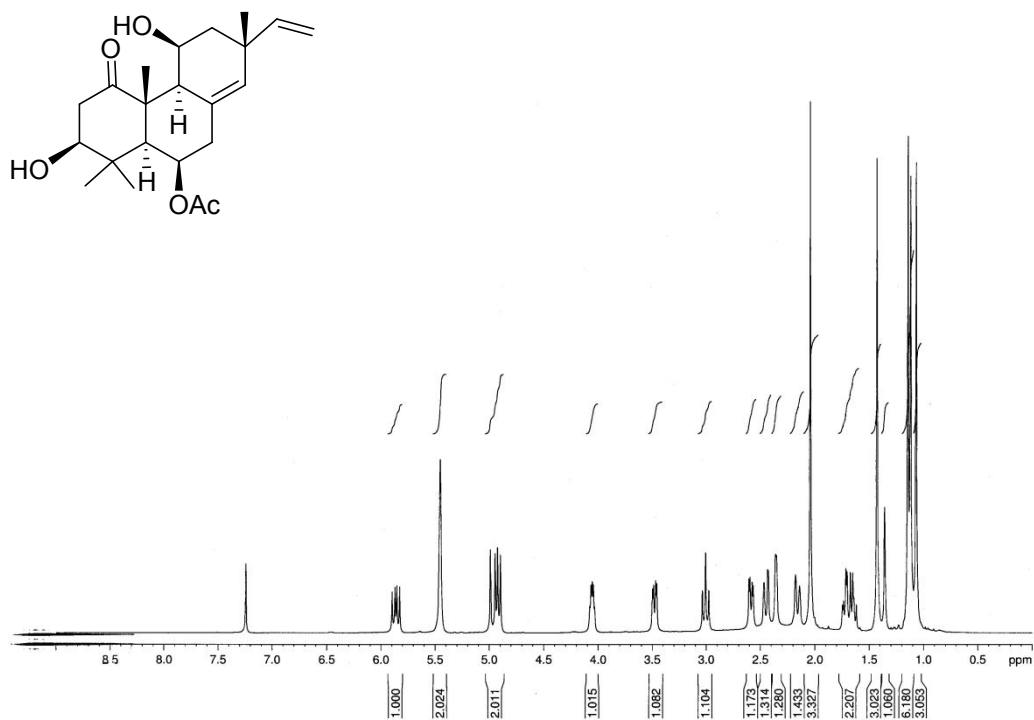

**Figure S25.** <sup>1</sup>H NMR spectrum (CDCl<sub>3</sub>, 400 MHz) of marginaol C (3)

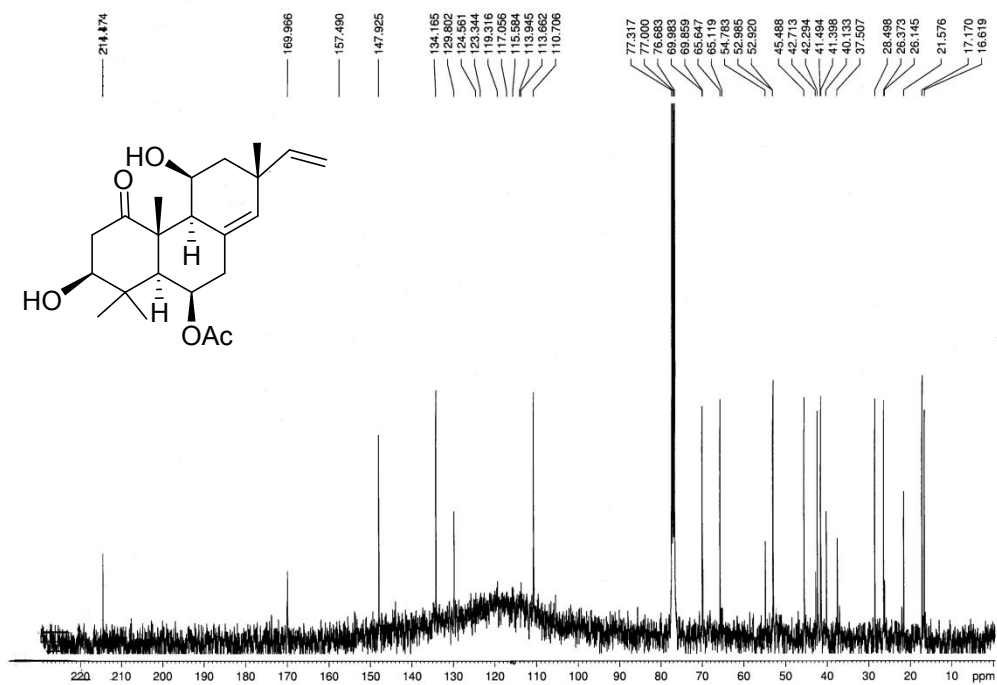

**Figure S26.** <sup>13</sup>C NMR spectrum (CDCl<sub>3</sub>, 100 MHz) of marginaol C (3)

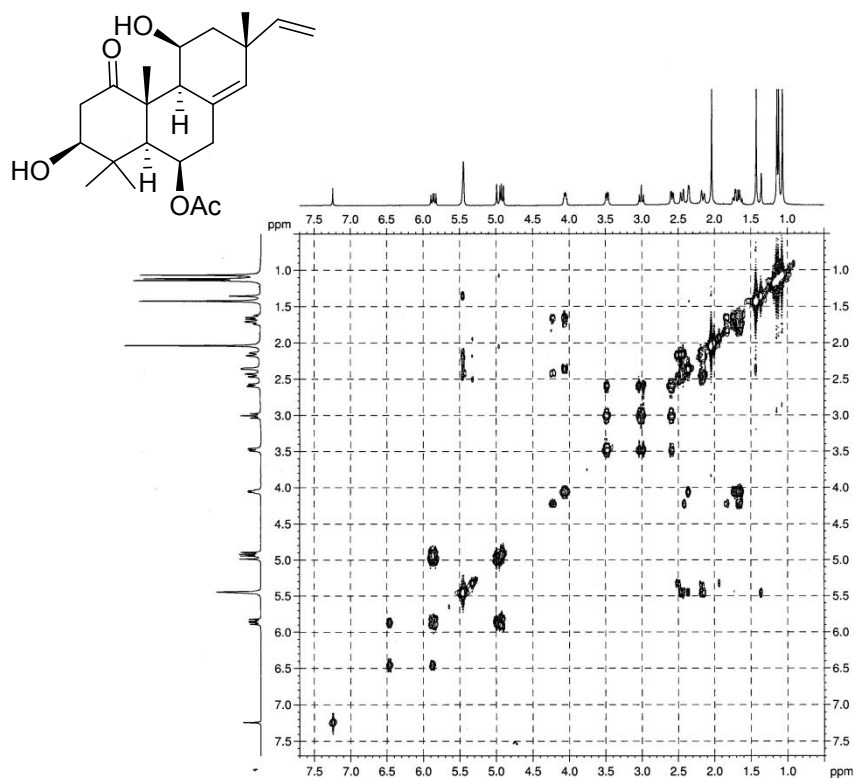

Figure S27. COSY spectrum of marginaol C (3) in CDCl<sub>3</sub>

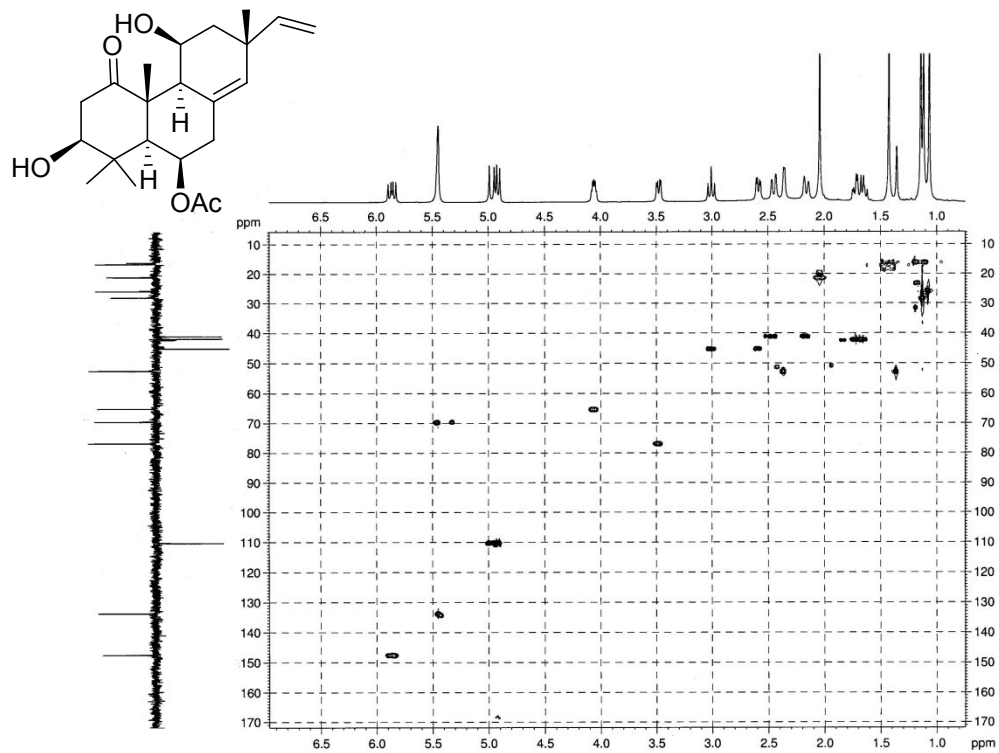

Figure S28. HMQC spectrum of marginaol C (3) in CDCl<sub>3</sub>

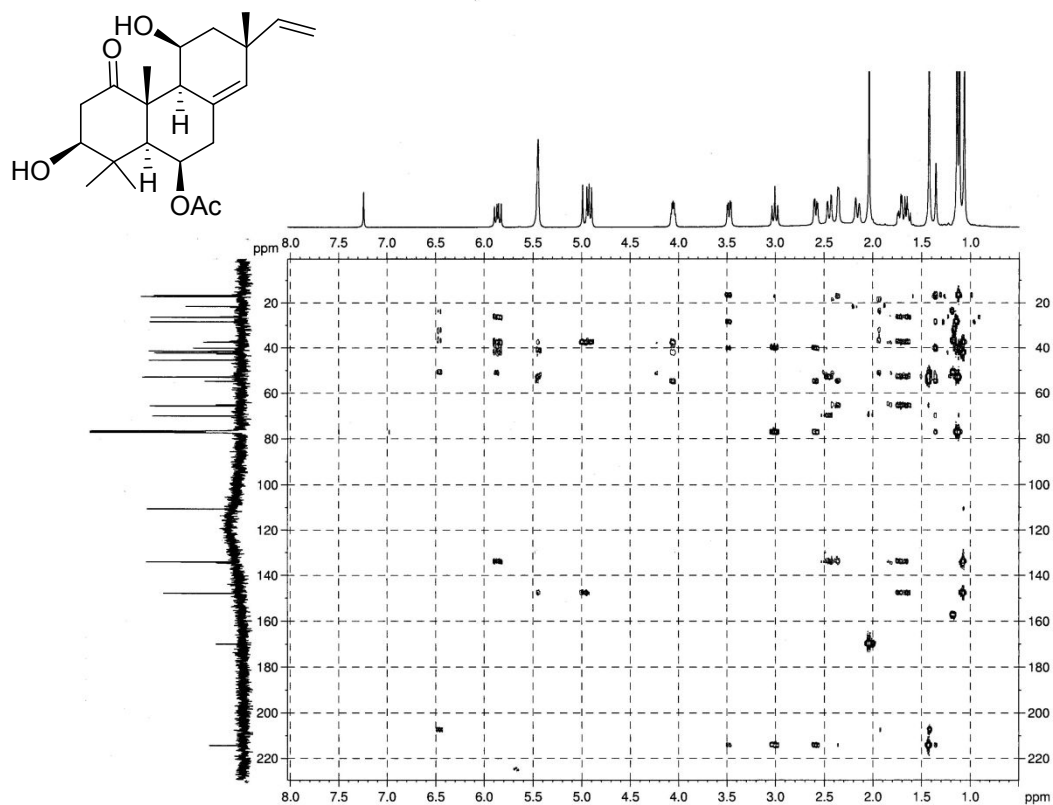

Figure S29. HMBC spectrum marginaol C (**3**) in  $\text{CDCl}_3$

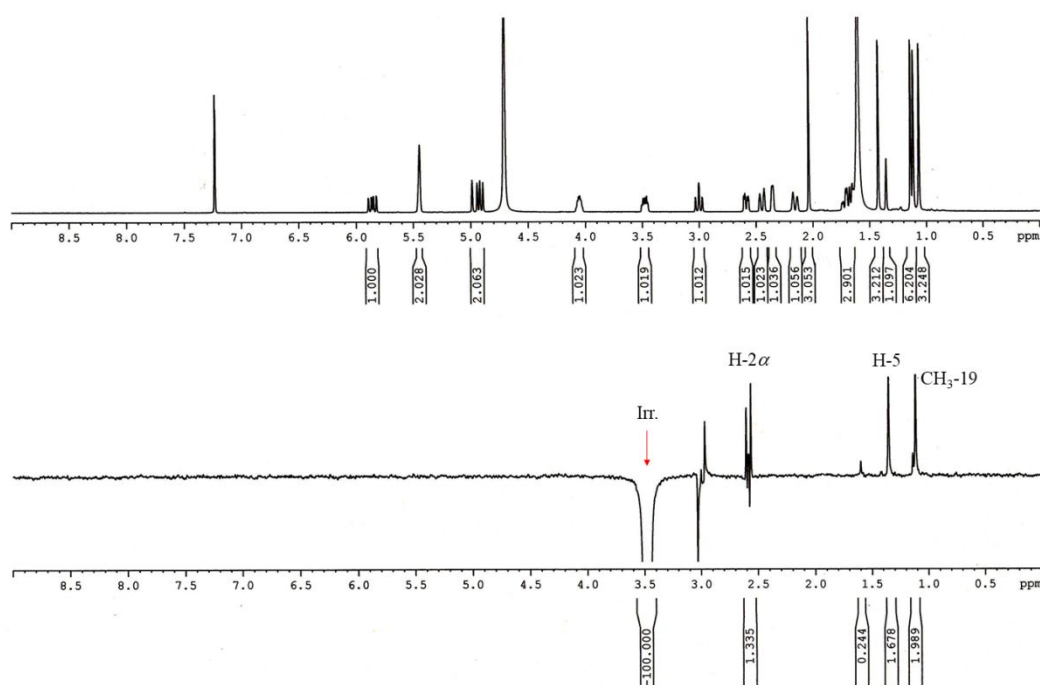

Figure S30. Difference NOE of **3** irradiating H-3 in  $\text{CDCl}_3$

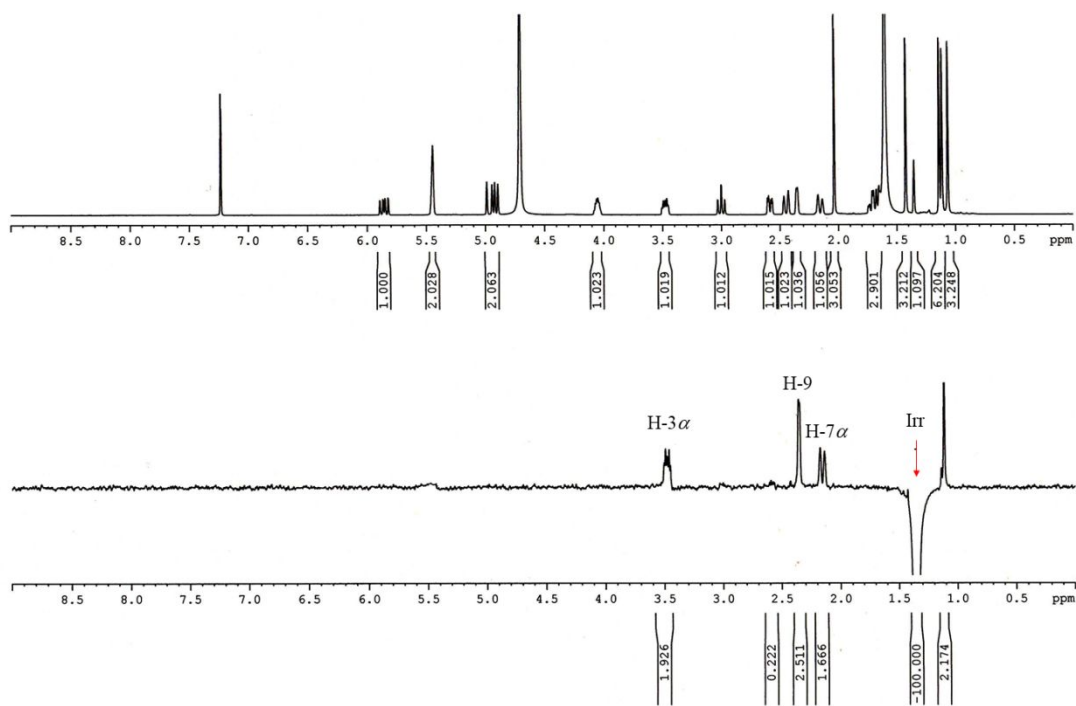

**Figure S31.** Difference NOE of **3** irradiating H-5 in  $\text{CDCl}_3$

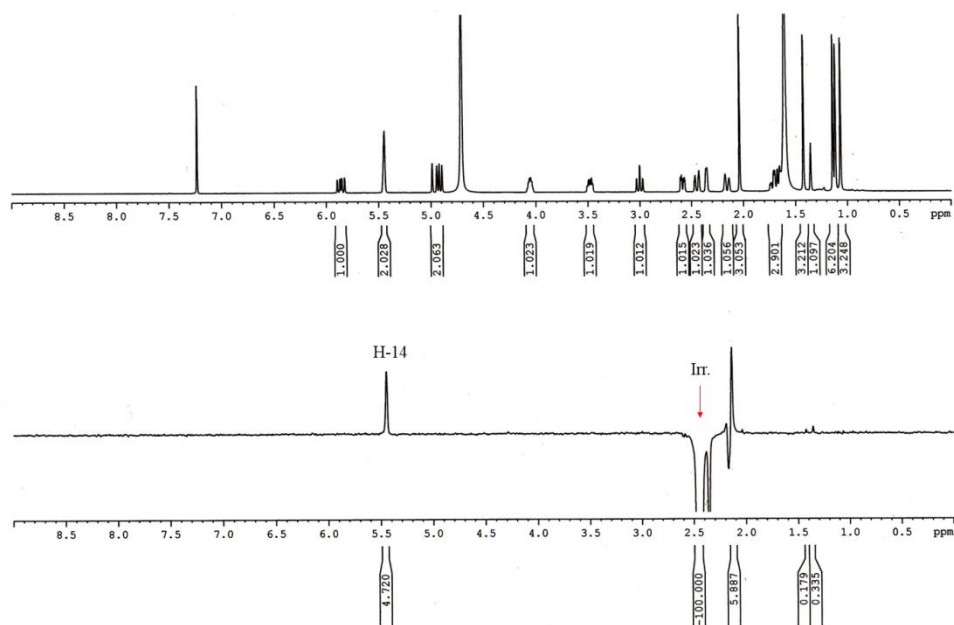

**Figure S32.** Difference NOE of **3** irradiating H-7 $\beta$  in  $\text{CDCl}_3$

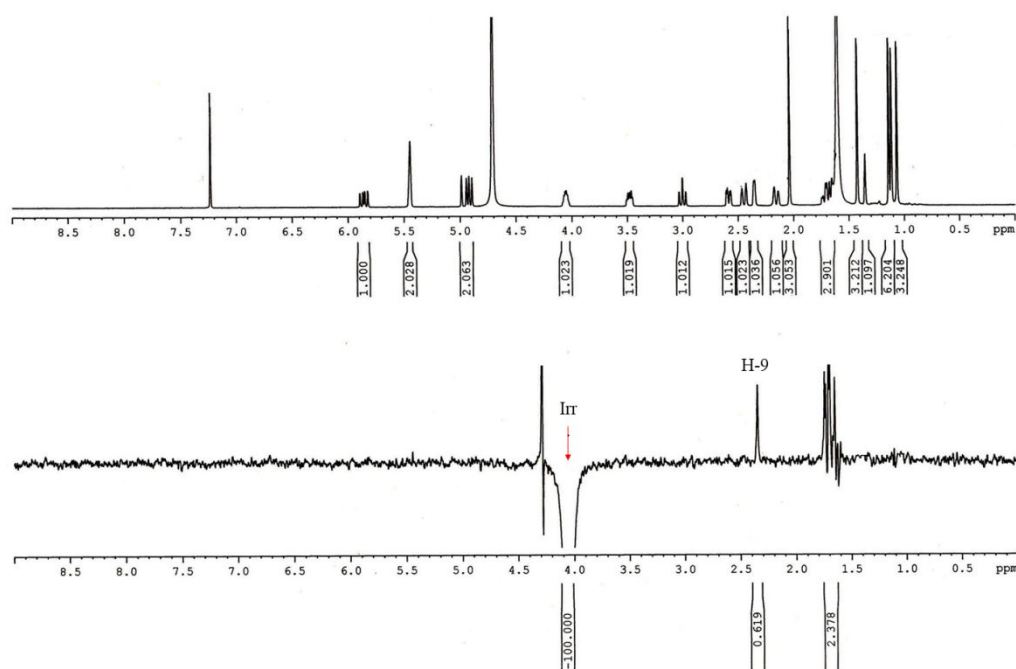

**Figure S33.** Difference NOE of **3** irradiating H-11 in  $\text{CDCl}_3$

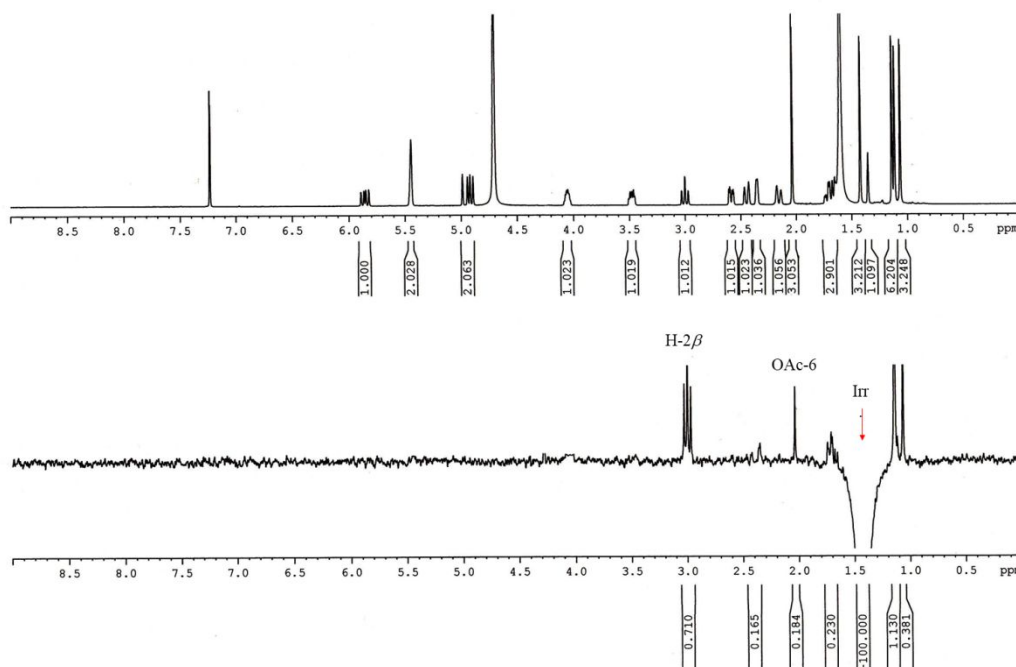

**Figure S34.** Difference NOE of **3** irradiating H<sub>3</sub>-20 in  $\text{CDCl}_3$

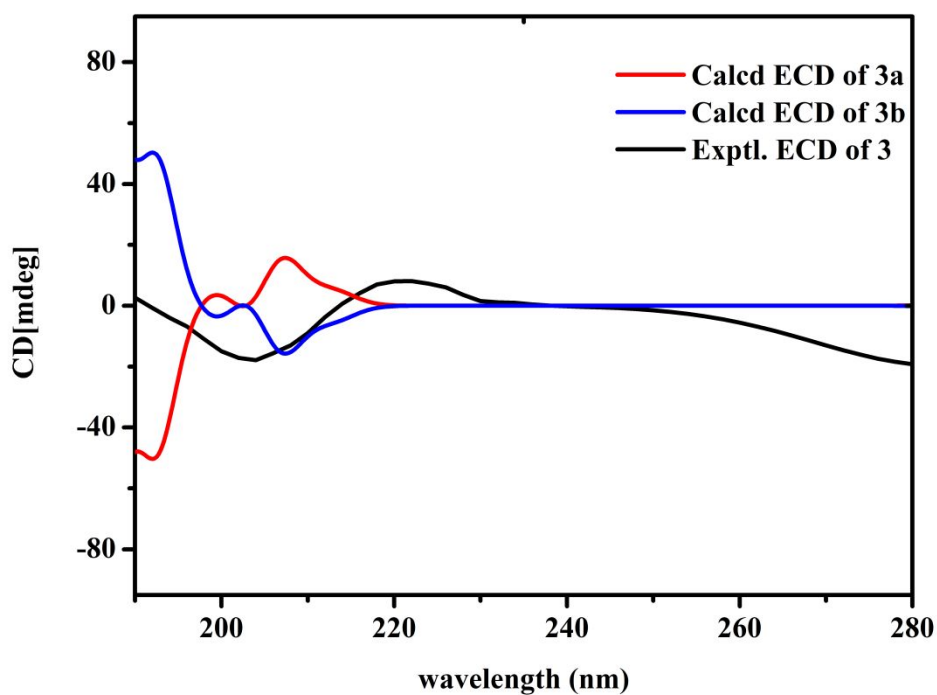

**Figure S35.** Calculated ECD spectra of (3*S*, 5*S*, 6*R*, 9*S*, 10*R*, 11*S*, 13*R*)-**3a** and (3*R*, 5*R*, 6*S*, 9*R*, 10*S*, 11*R*, 13*S*)-**3b** isomers and the experimental ECD spectrum of **3** in MeOH

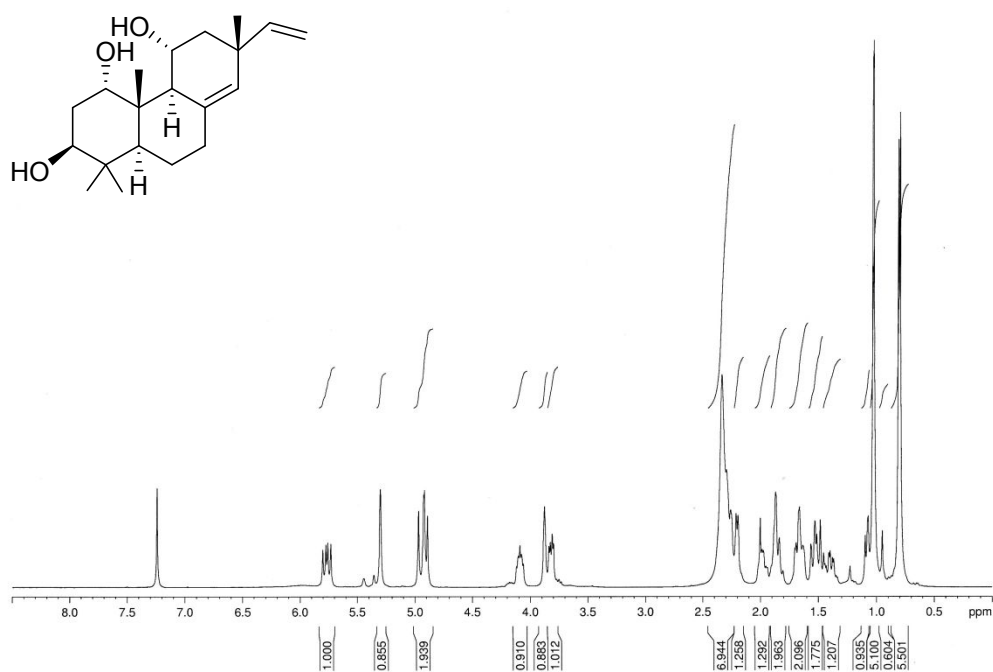

**Figure S36.**  $^1\text{H}$  NMR spectrum ( $\text{CDCl}_3$ , 400 MHz) of marginaol D (**4**)

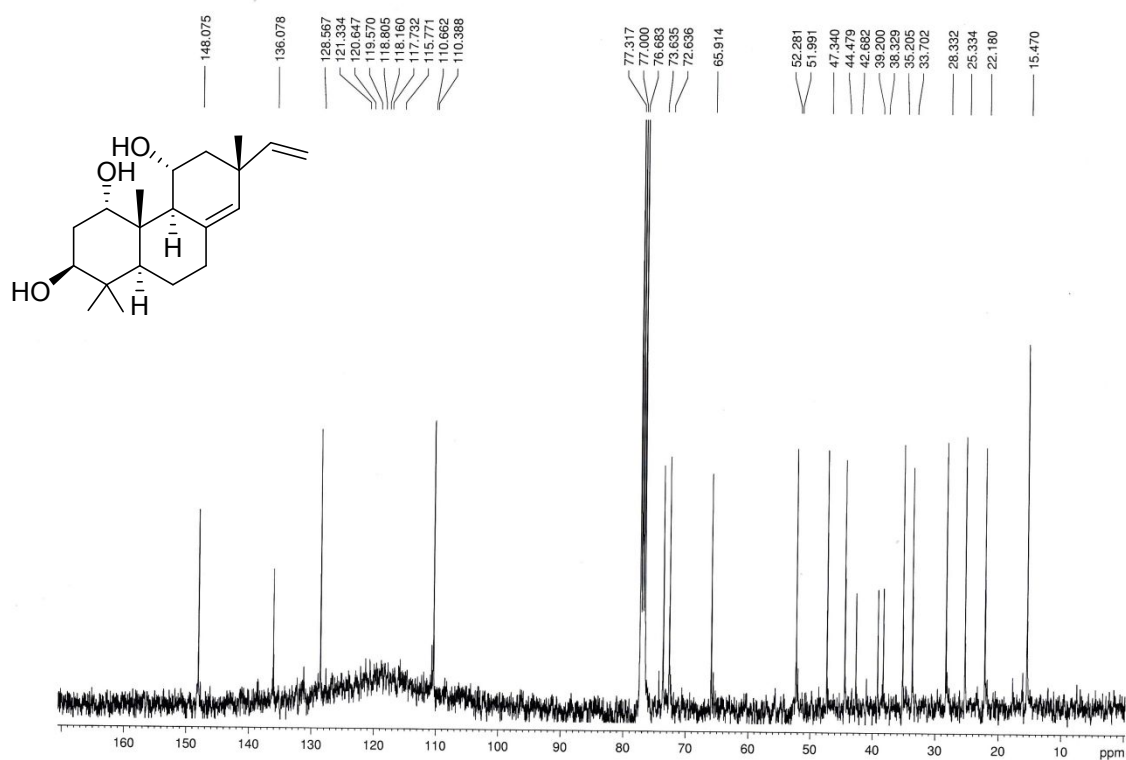

**Figure S37.** <sup>13</sup>C NMR spectrum (CDCl<sub>3</sub>, 100 MHz) of marginaol D (4)

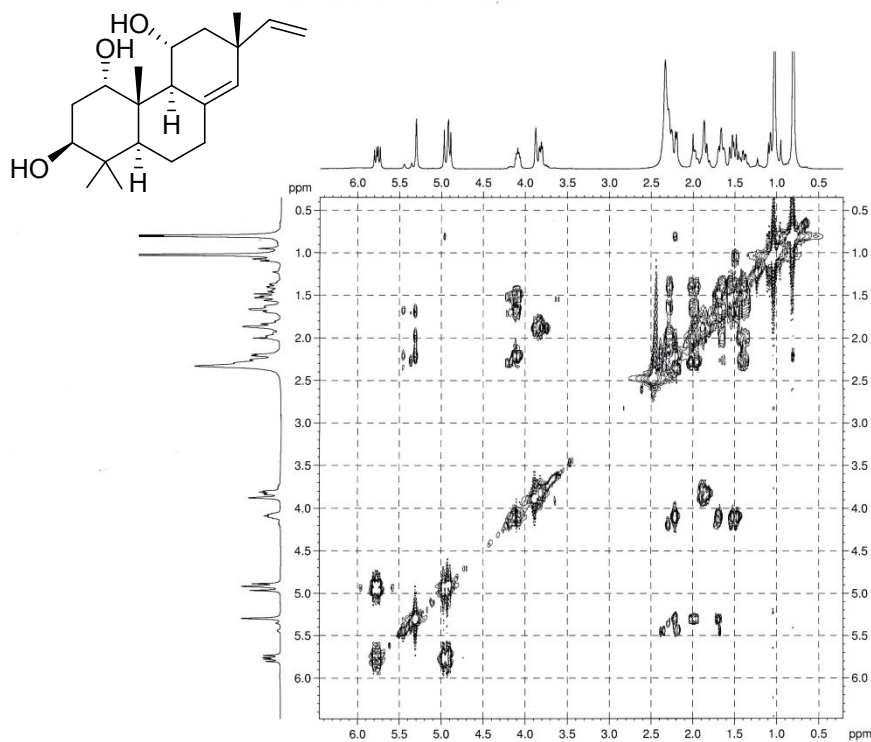

**Figure S38.** COSY spectrum of marginaol D (4) in CDCl<sub>3</sub>

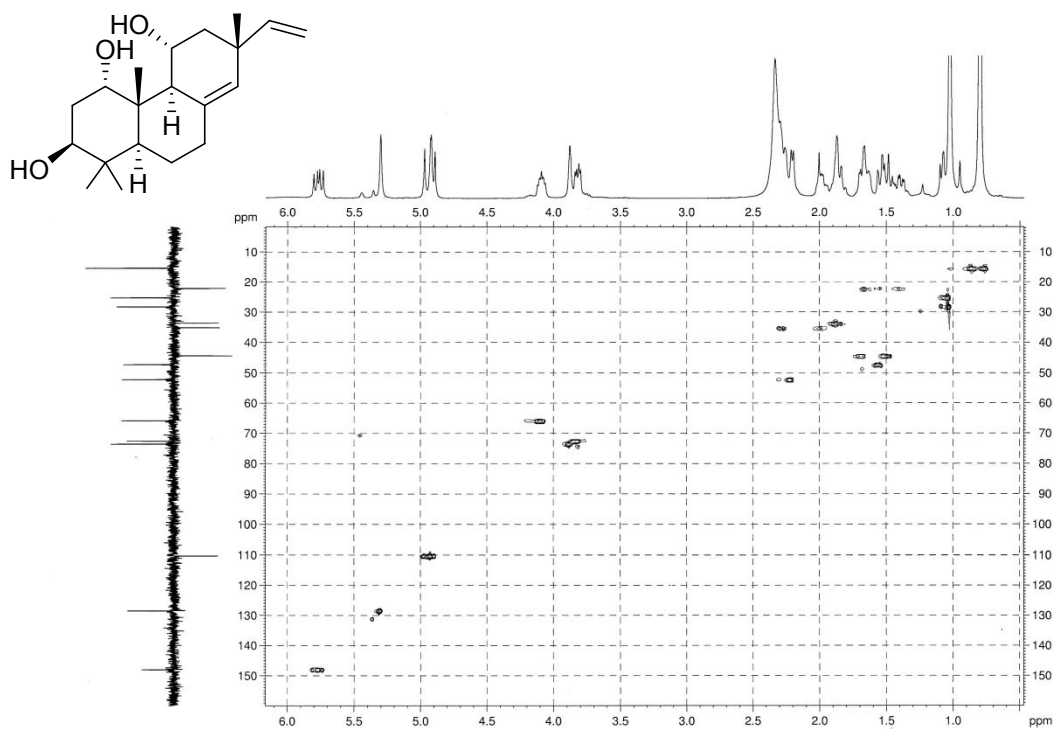

Figure S39. HMQC spectrum of marginaol D (4) in CDCl<sub>3</sub>

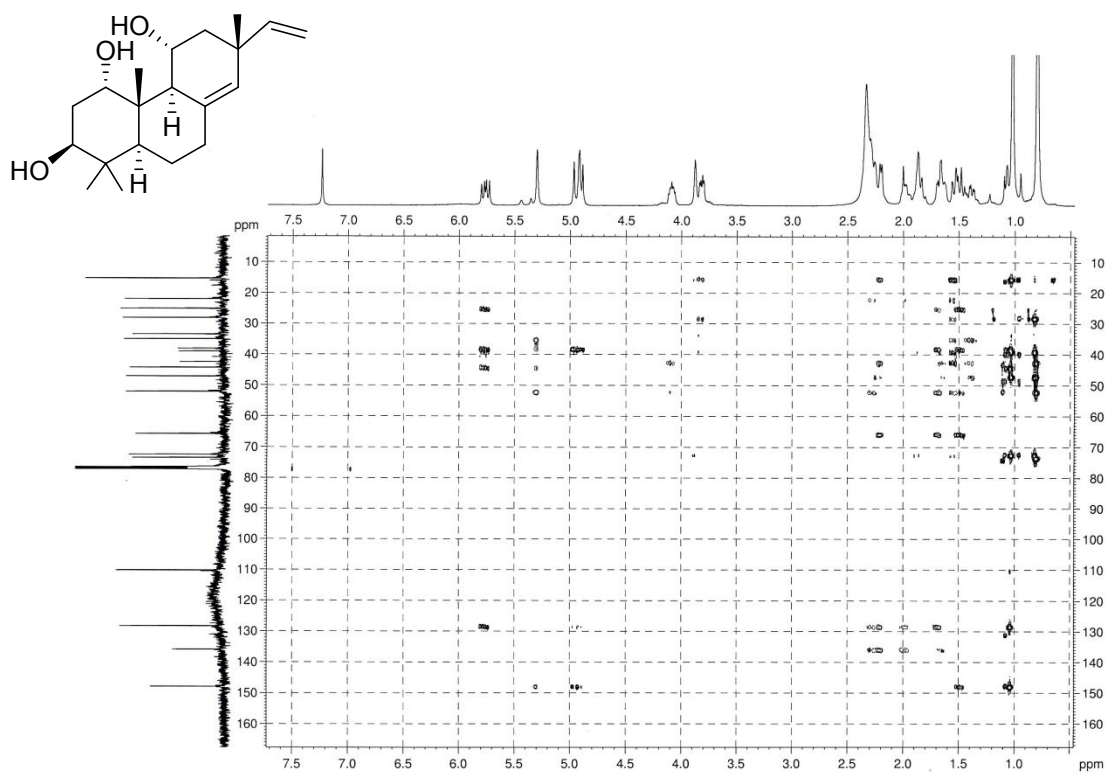

Figure S40. HMBC spectrum of marginaol D (4) in CDCl<sub>3</sub>

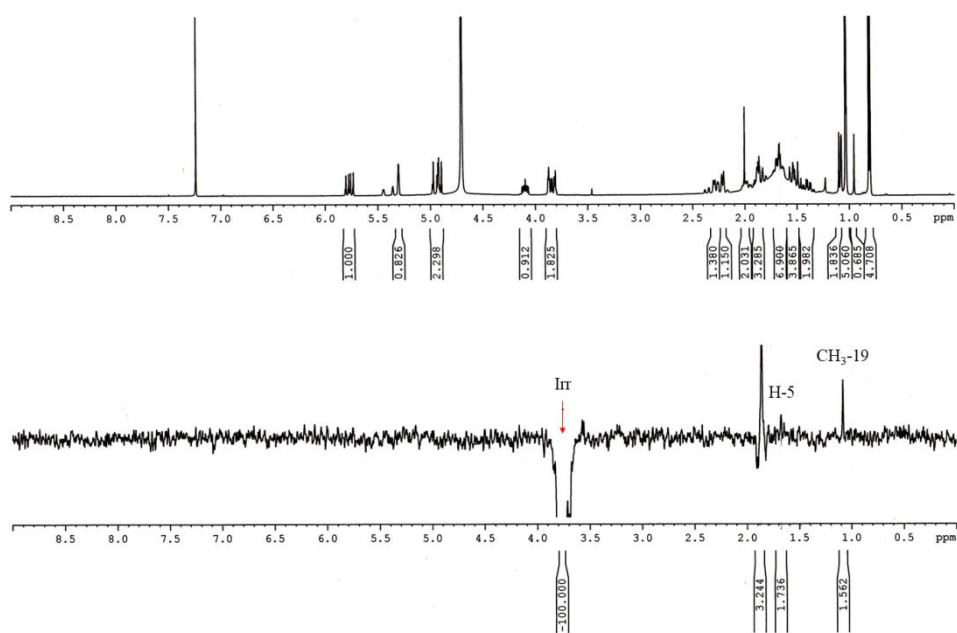

**Figure S41.** Difference NOE of **4** irradiating H-3 in  $\text{CDCl}_3$

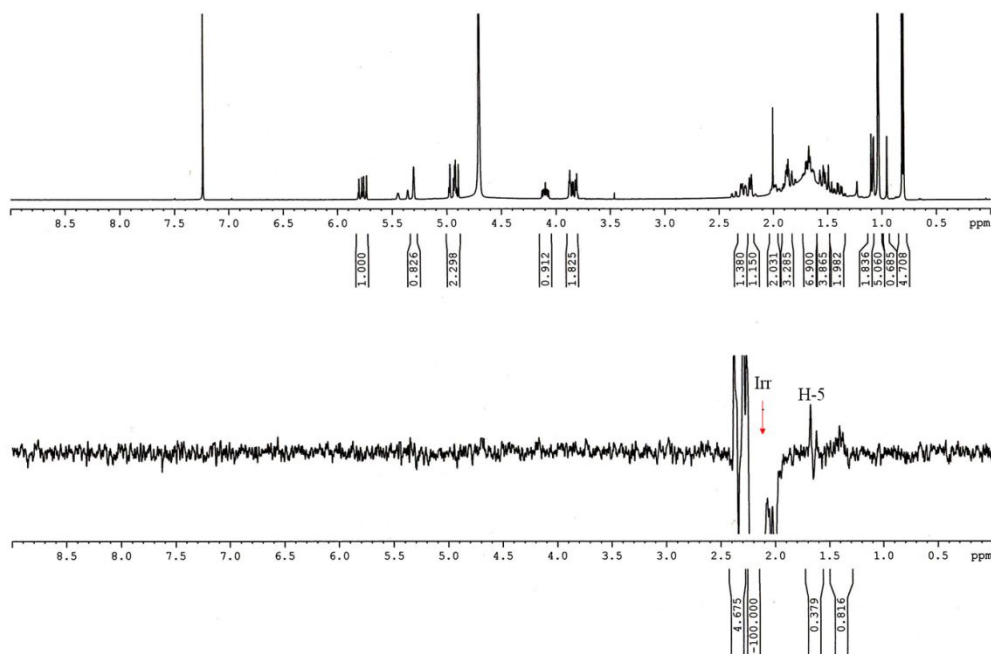

**Figure S42.** Difference NOE of **4** irradiating H-9 in  $\text{CDCl}_3$

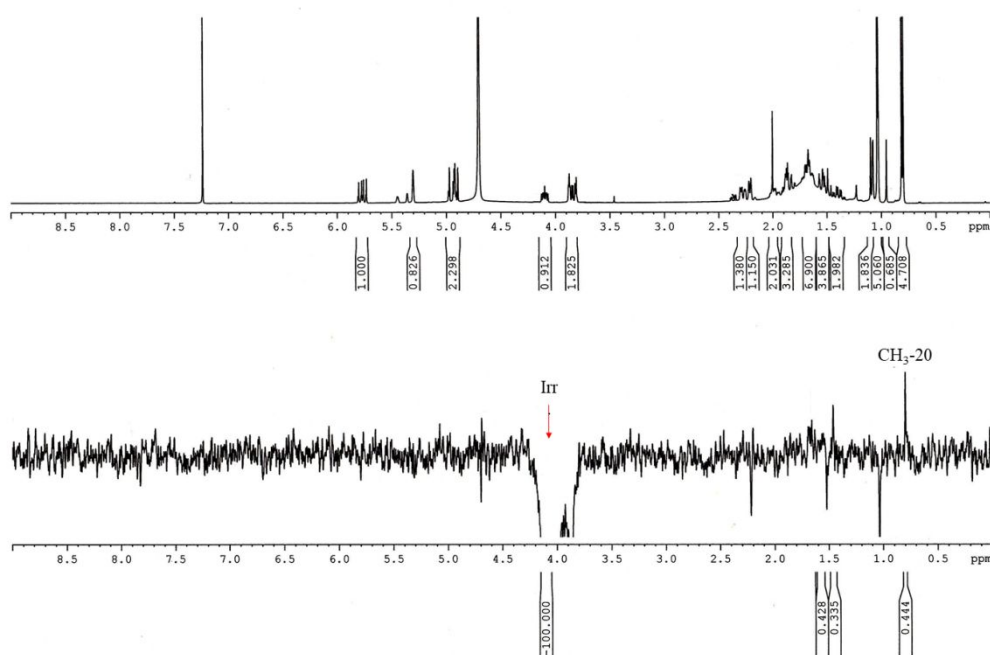

**Figure S43.** Difference NOE of **4** irradiating H-11 in  $\text{CDCl}_3$

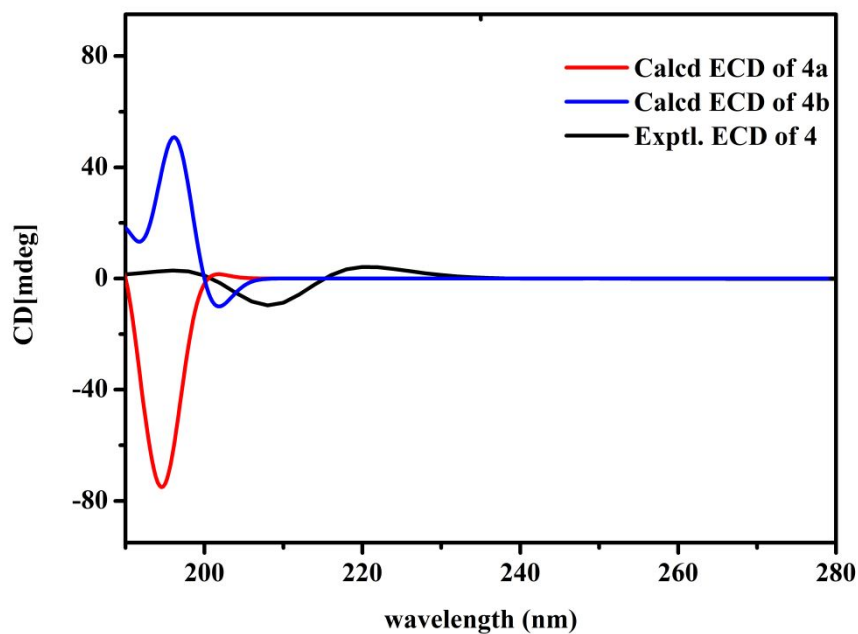

**Figure S44.** Calculated ECD spectra of (1*S*, 3*S*, 5*S*, 9*S*, 10*S*, 11*R*, 13*R*)-**4a** and (1*R*, 3*R*, 5*R*, 9*R*, 10*R*, 11*S*, 13*S*)-**4b** isomers and the experimental ECD spectrum of **4** in MeOH

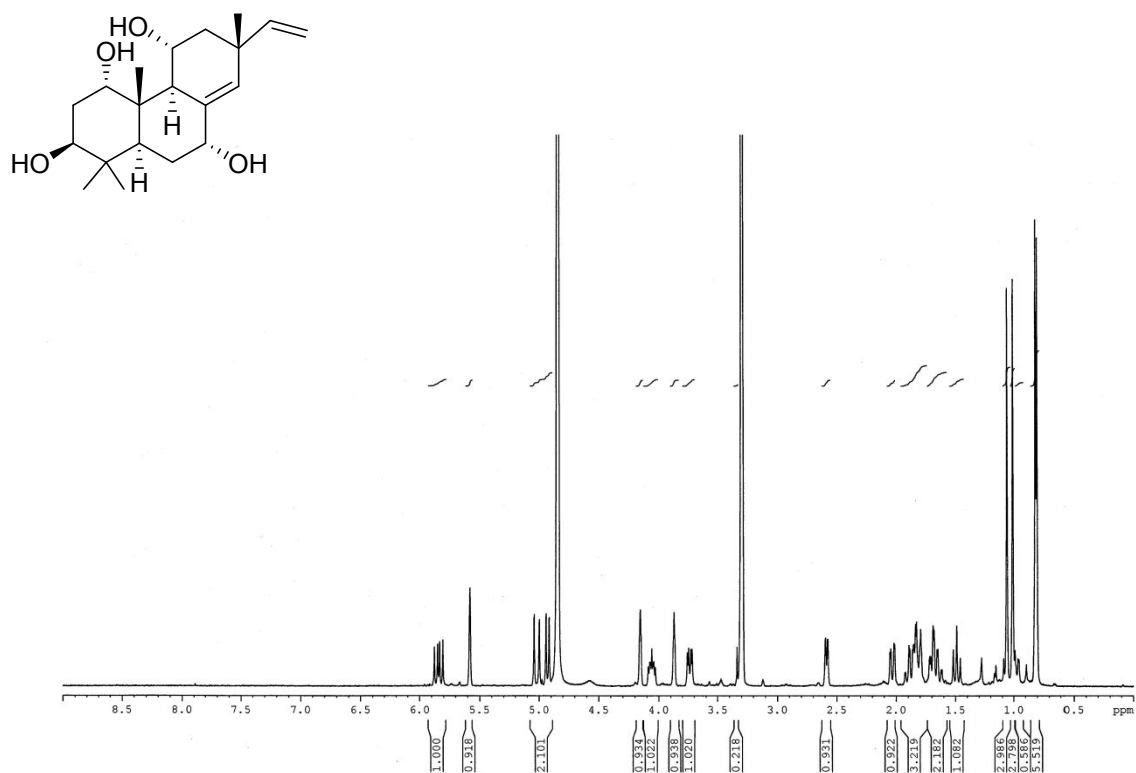

**Figure S45.** <sup>1</sup>H NMR spectrum (CD<sub>3</sub>OD, 400 MHz) of marginaol E (5)

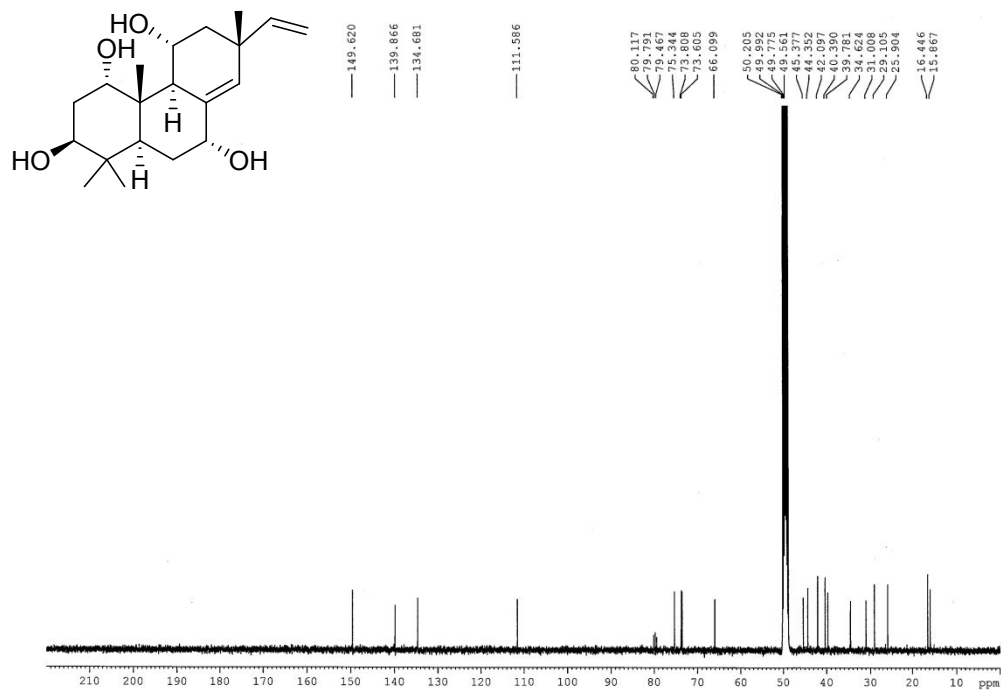

**Figure S46.** <sup>13</sup>C NMR spectrum (CD<sub>3</sub>OD, 100 MHz) of marginaol E (5)

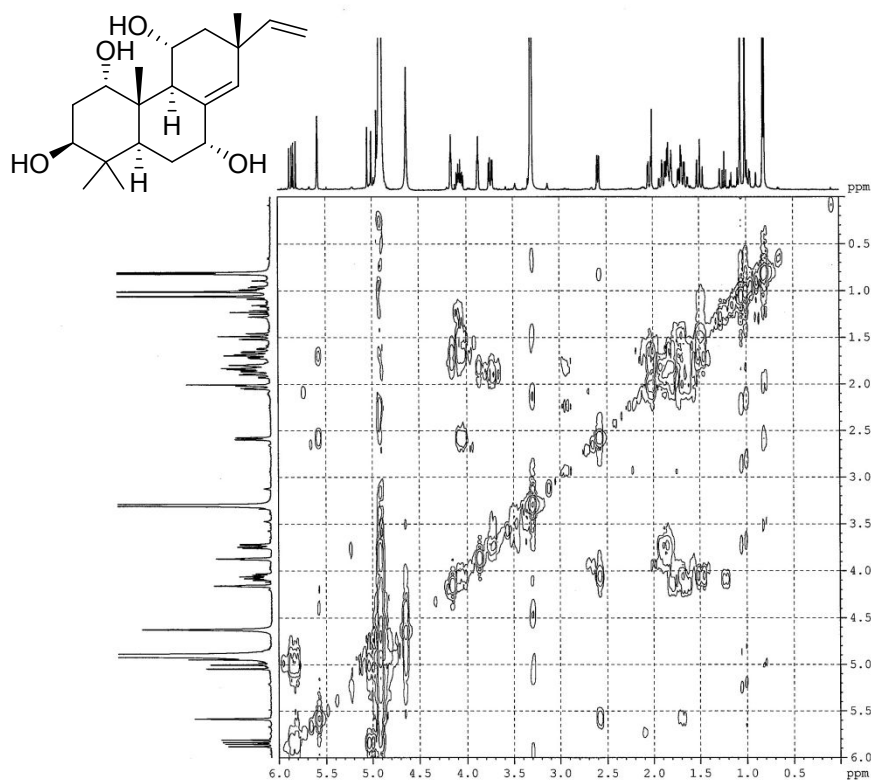

Figure S47. COSY spectrum of marginaol E (5) in CD<sub>3</sub>OD

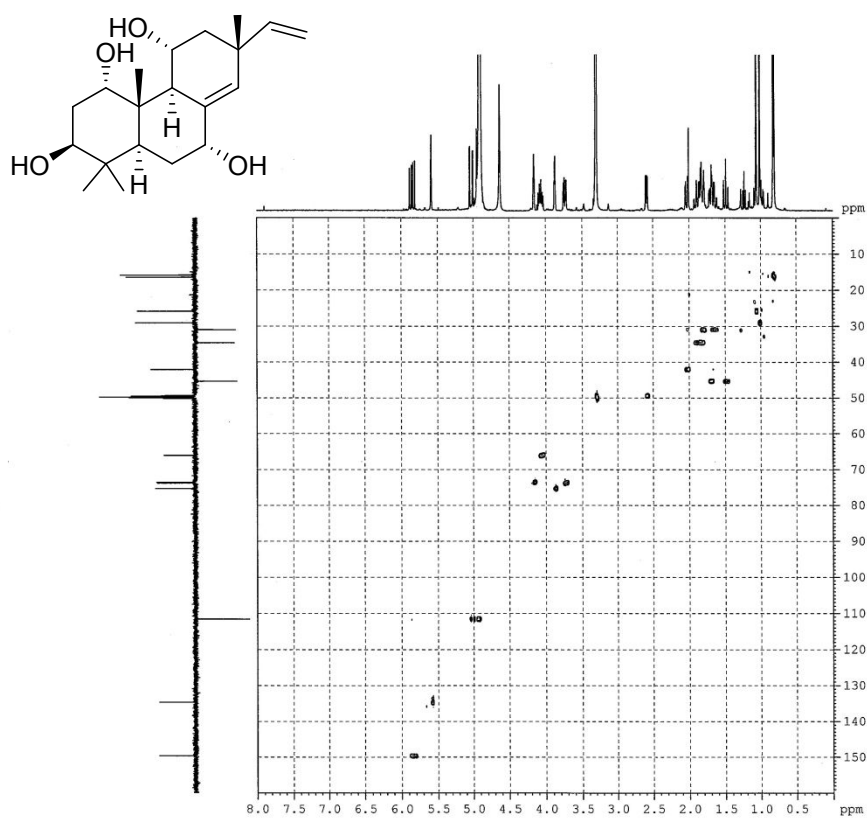

Figure S48. HMQC spectrum of marginaol E (5) in CD<sub>3</sub>OD

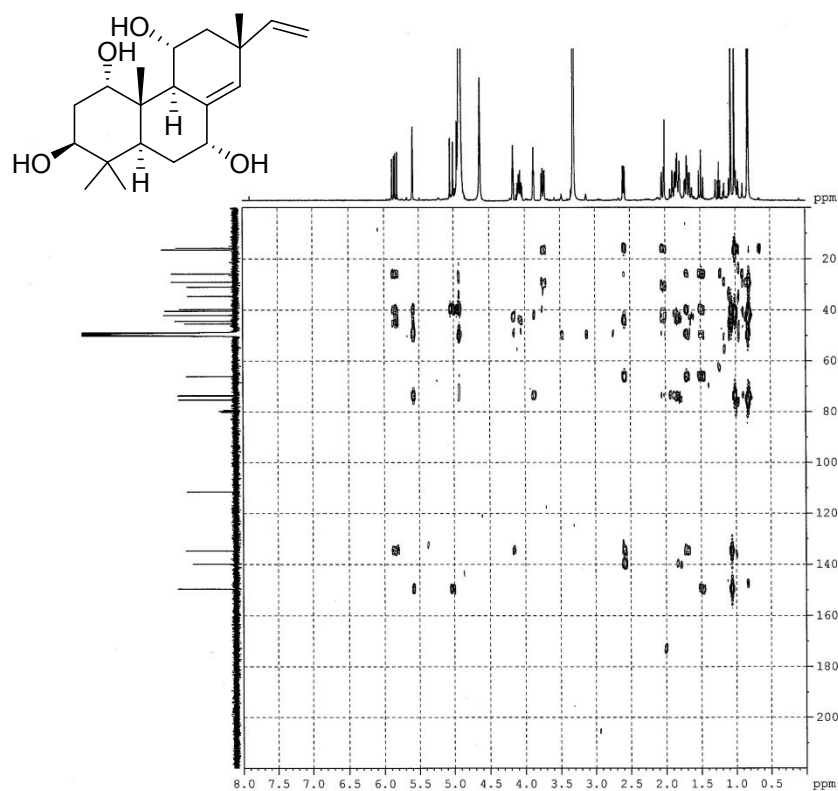

**Figure S49.** HMBC spectrum of marginaol E (**5**) in CD<sub>3</sub>OD

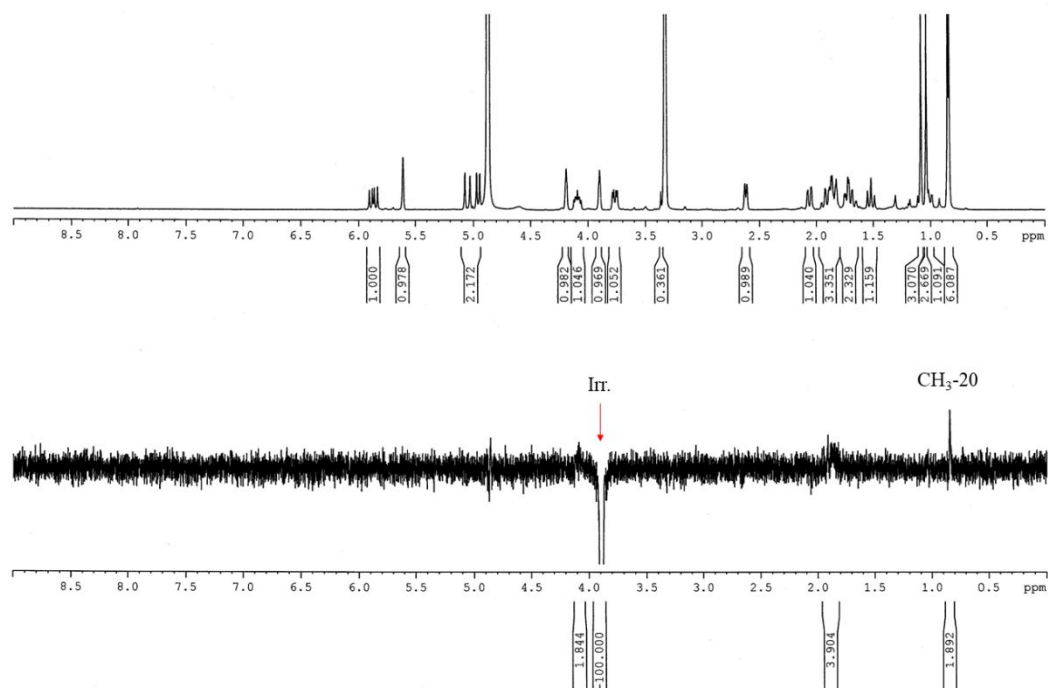

**Figure S50.** Difference NOE of **5** irradiating H-1 in CD<sub>3</sub>OD

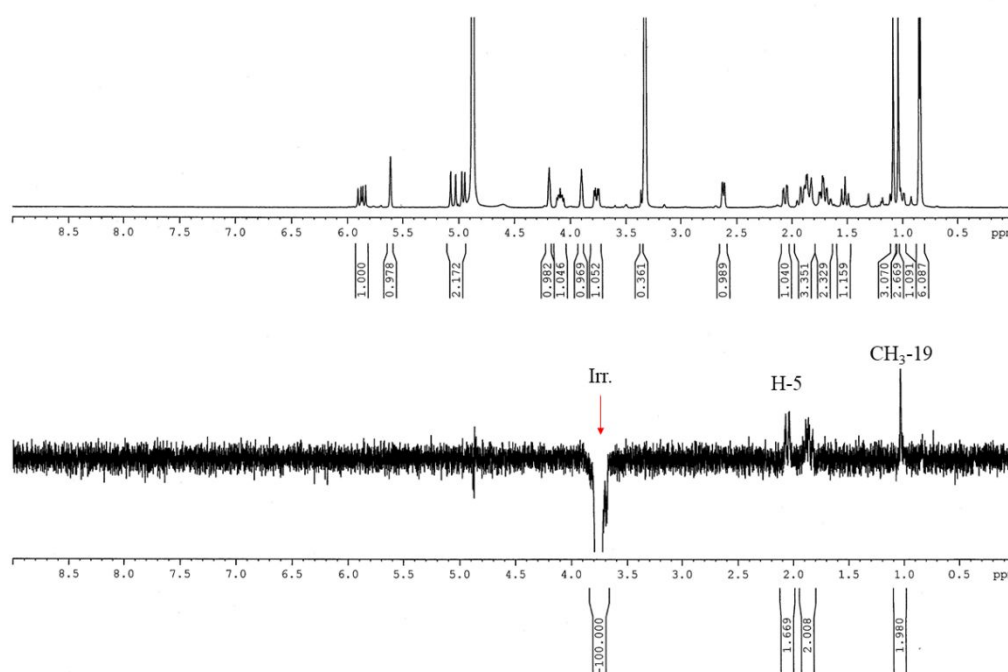

**Figure S51.** Difference NOE of **5** irradiating H-3 in CD<sub>3</sub>OD

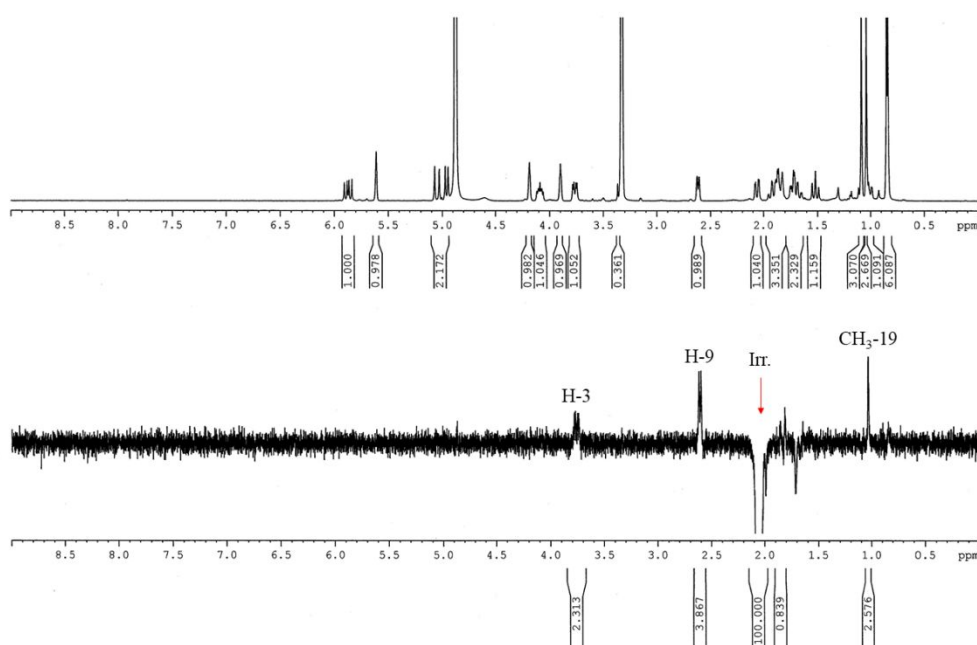

**Figure S52.** Difference NOE of **5** irradiating H-5 in CD<sub>3</sub>OD

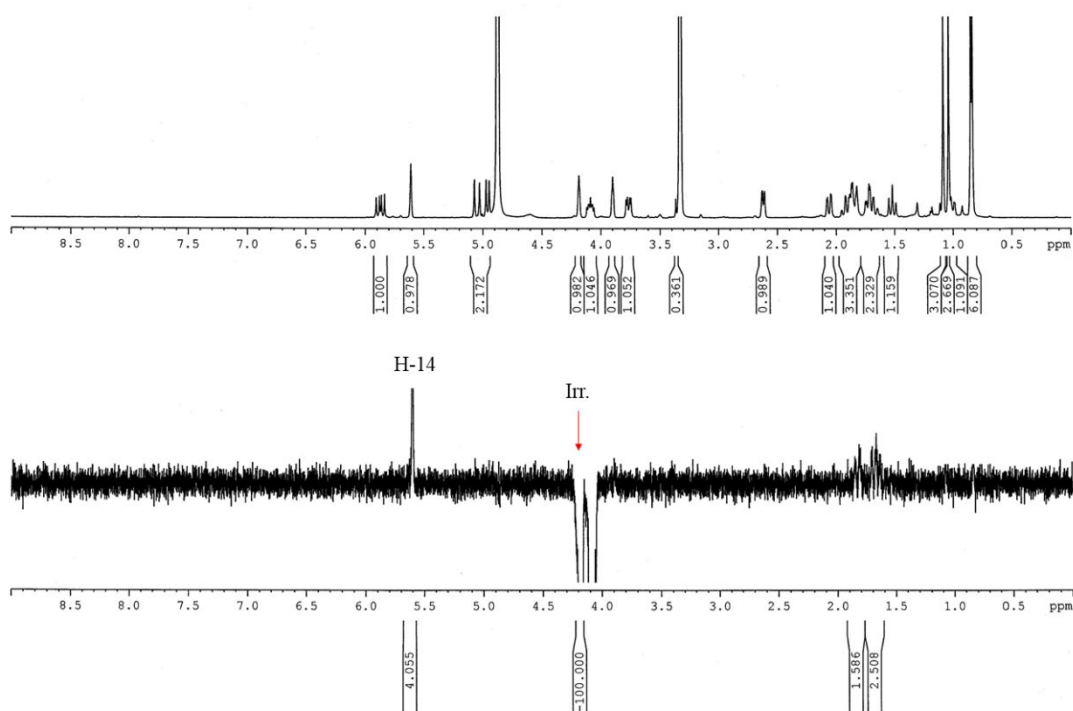

Figure S53. Difference NOE of **5** irradiating H-7 in  $\text{CD}_3\text{OD}$

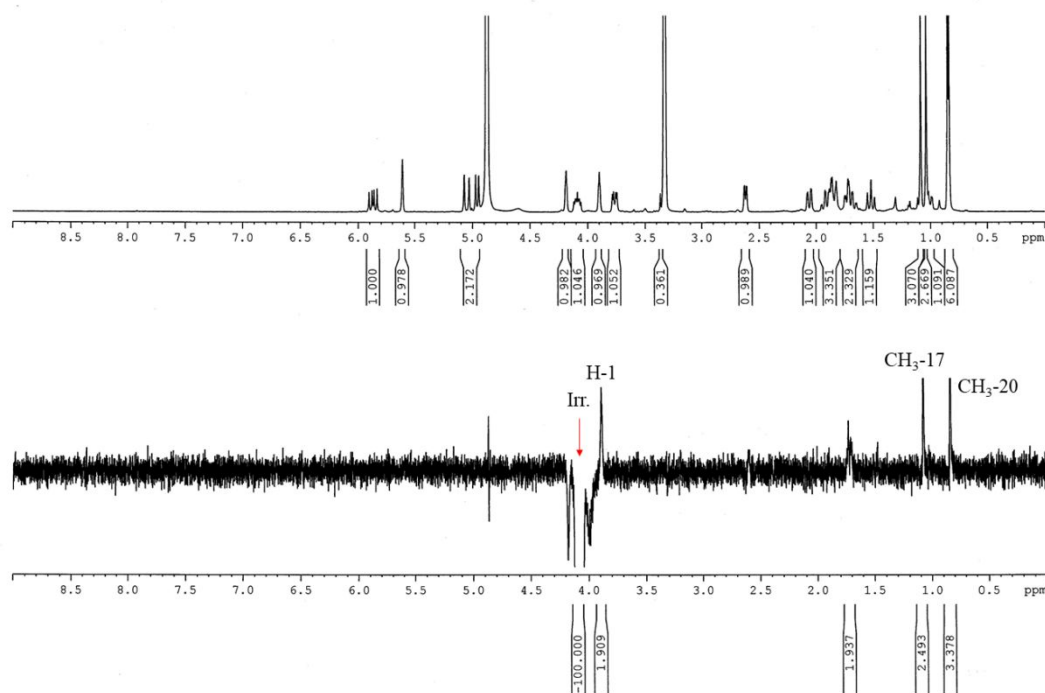

Figure S54. Difference NOE of **5** irradiating H-11 in  $\text{CD}_3\text{OD}$

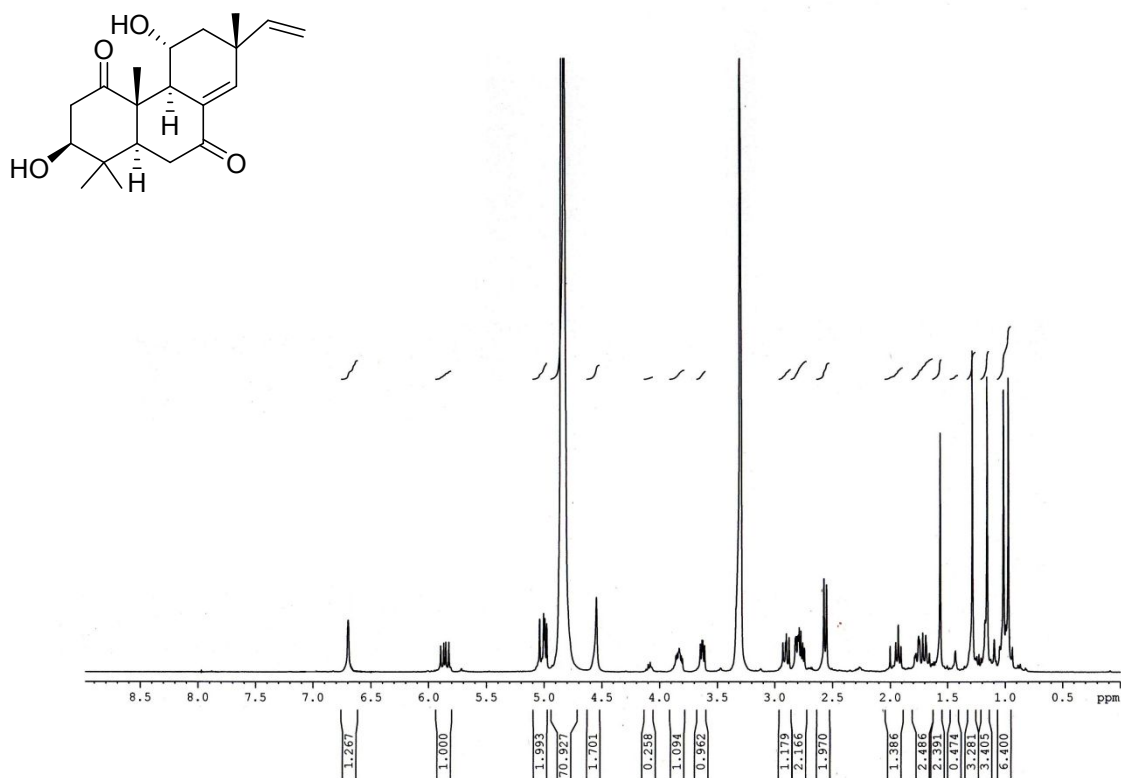

**Figure S55.** <sup>1</sup>H NMR spectrum (CD<sub>3</sub>OD, 400 MHz) of marginaol F (6)

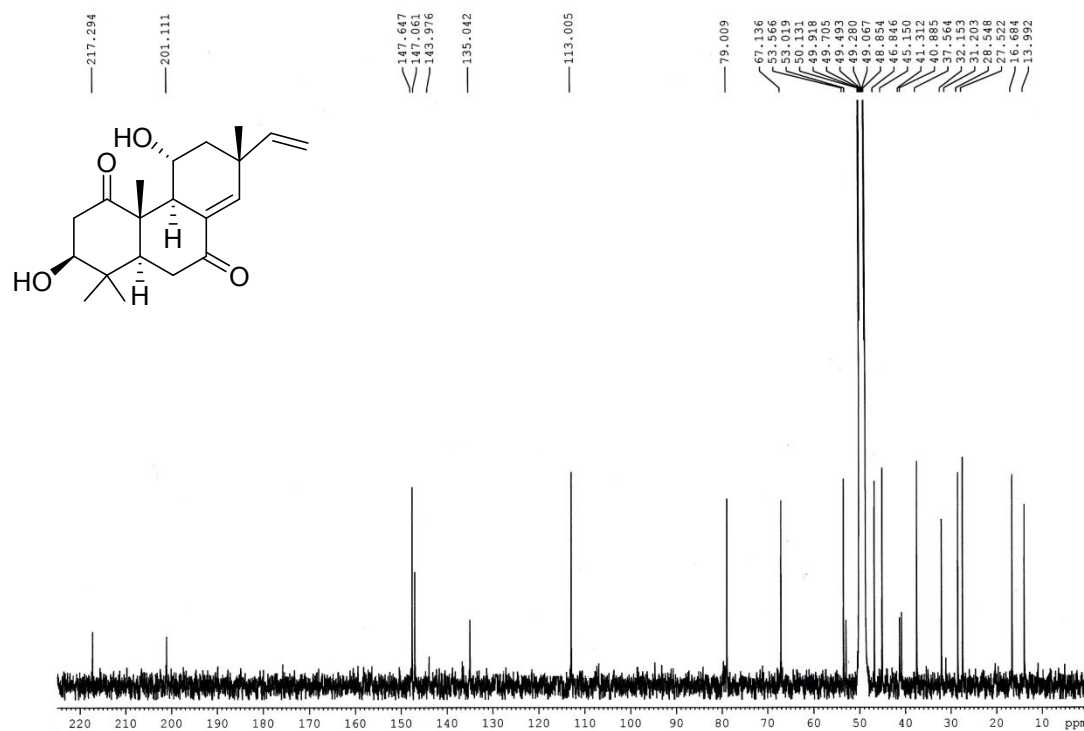

**Figure S56.** <sup>13</sup>C NMR spectrum (CD<sub>3</sub>OD, 100 MHz) of marginaol E (6)

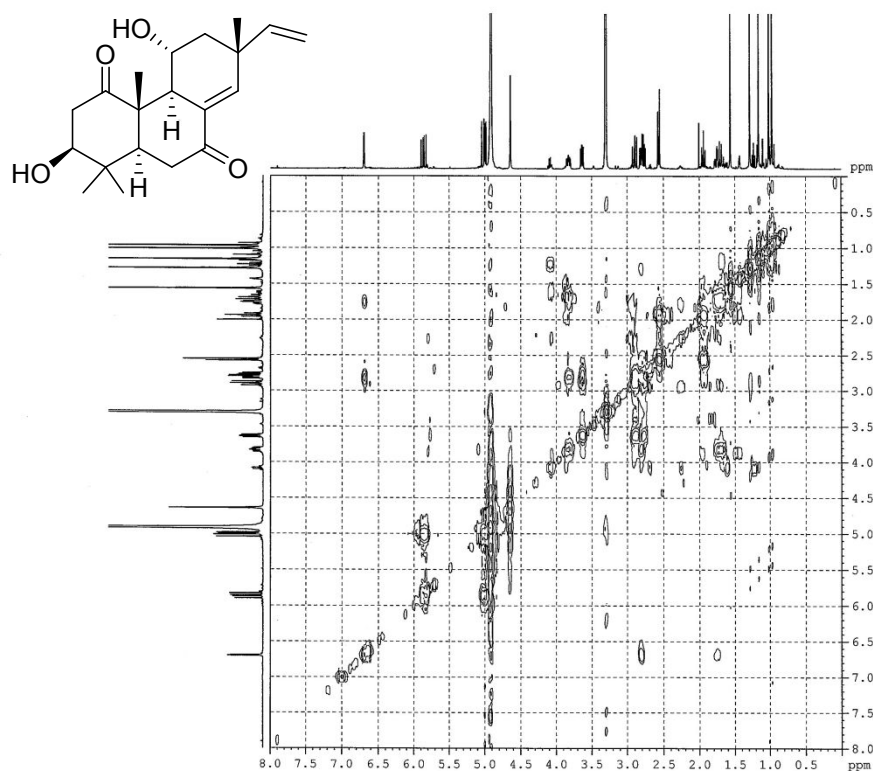

Figure S57. COSY spectrum of marginaol E (6) in CD<sub>3</sub>OD

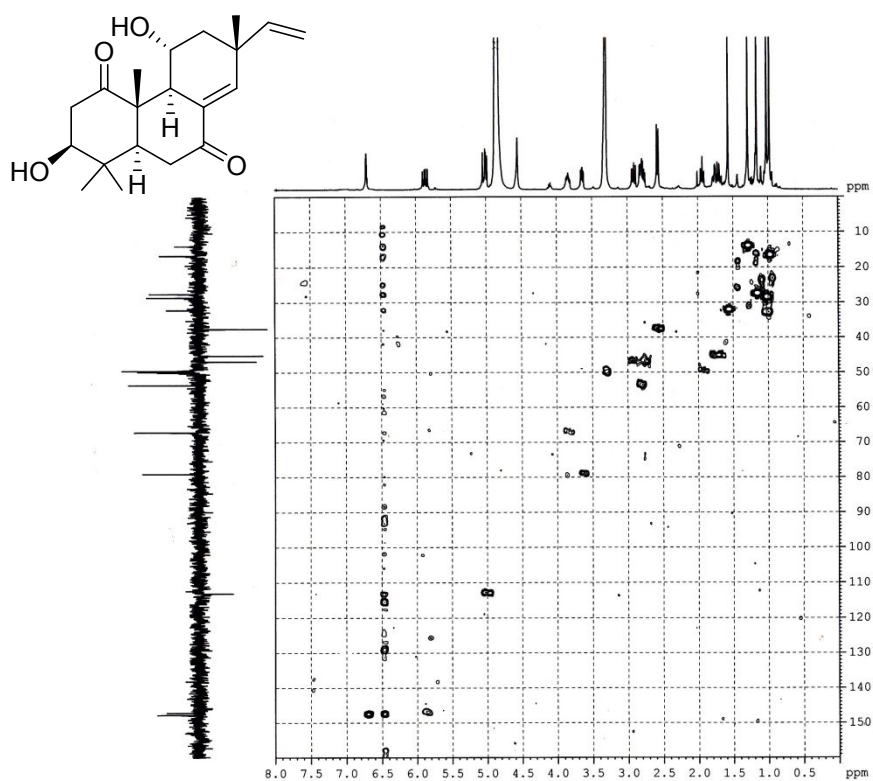

Figure S58. HMQC spectrum of marginaol E (6) in CD<sub>3</sub>OD

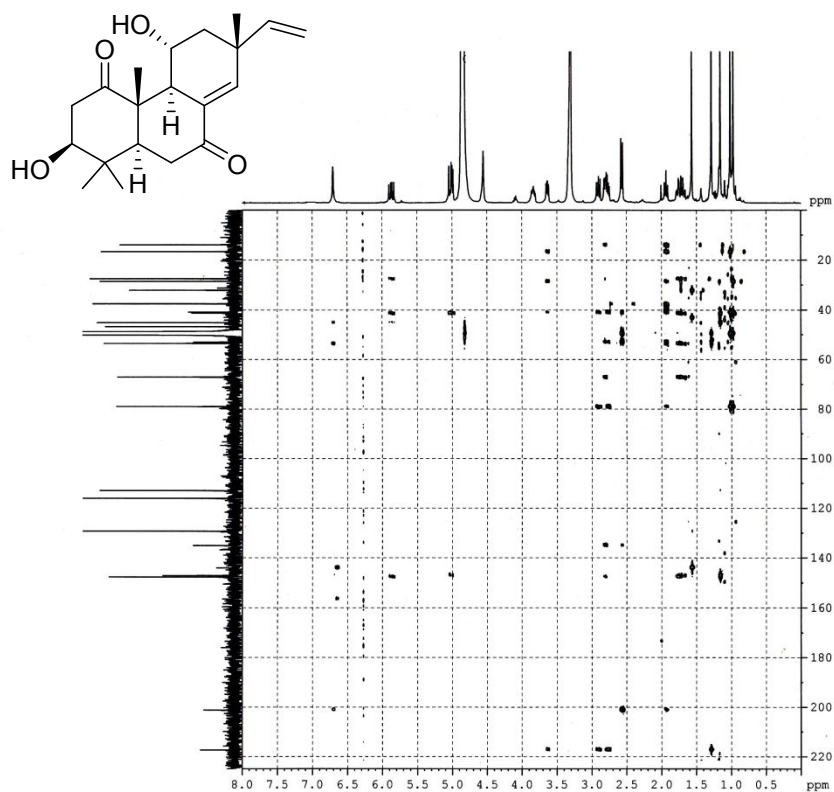

**Figure S59.** HMBC spectrum of marginaol E (**6**) in CD<sub>3</sub>OD

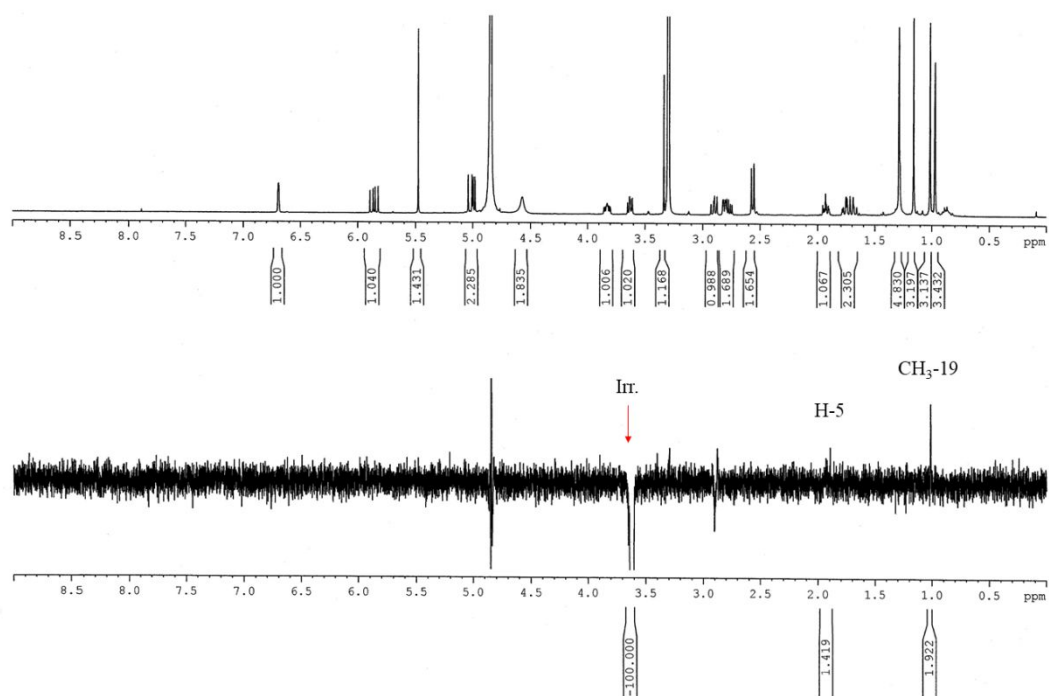

**Figure S60.** Difference NOE of **6** irradiating H-3 in CD<sub>3</sub>OD

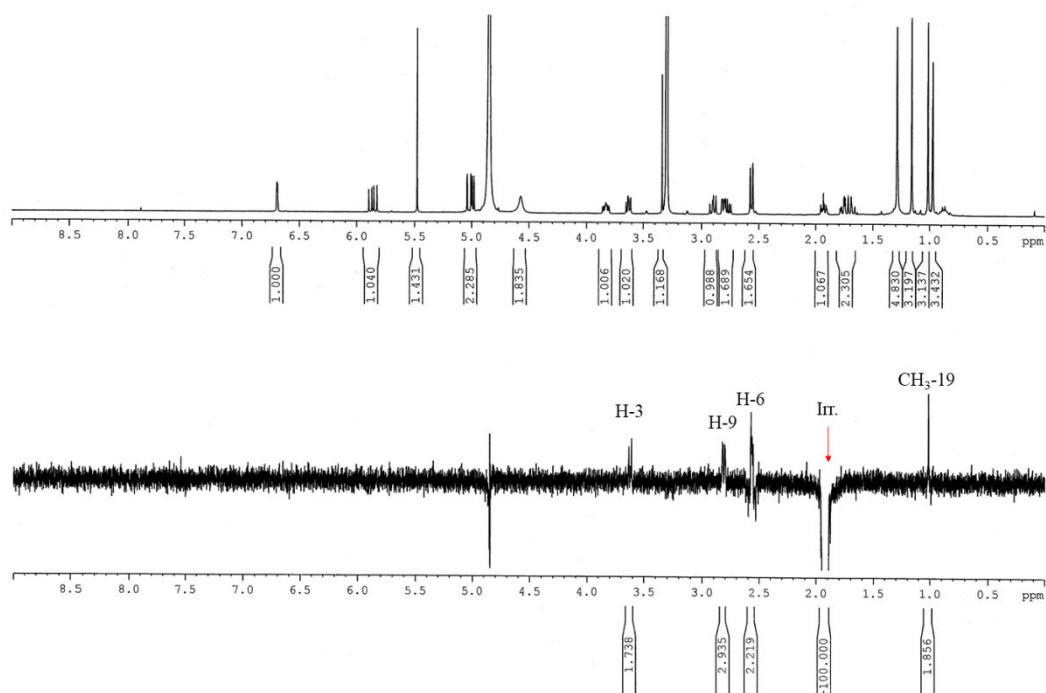

**Figure S61.** Difference NOE of **6** irradiating H-5 in  $\text{CD}_3\text{OD}$

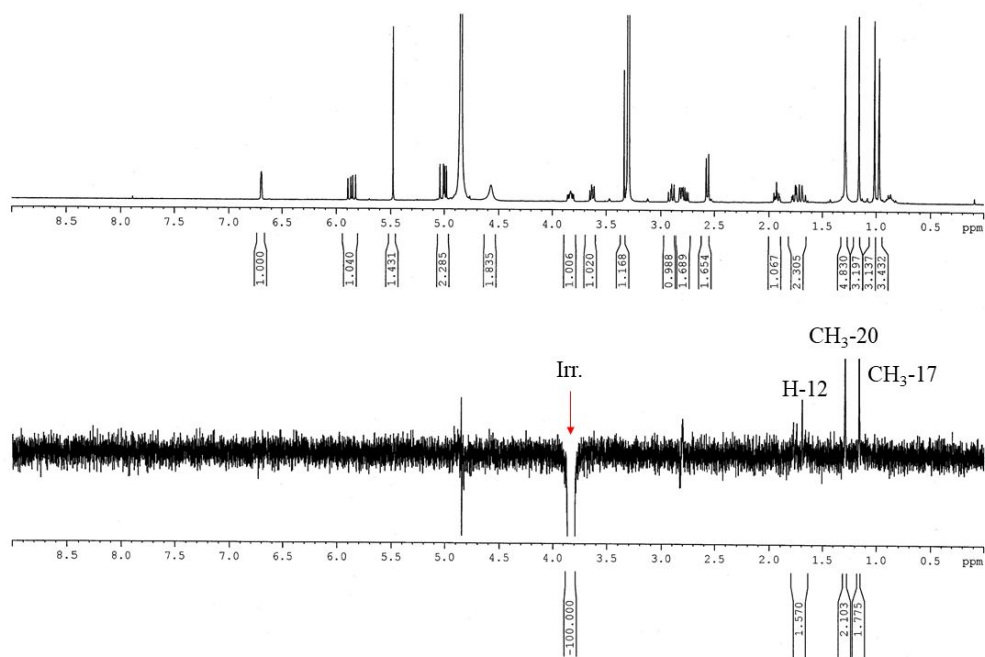

**Figure S62.** Difference NOE of **6** irradiating H-11 in  $\text{CD}_3\text{OD}$
